# Supplementary material for: A comparison of common metrics used to quantify the effectiveness of conservation interventions
Source: PeerJ. 2020 Sep 23;8:e9873. doi: 10.7717/peerj.9873 (PMC7519717; doi:10.7717/peerj.9873)
Supplement: Supplemental Information 1 [file peerj-08-9873-s001.xls]

## Sheet: dataset
Nt1	Nt2	Nt	Nc1	Nc2	Nc	Nt1/Nt2	Nc1/Nc2	Nt1/Nc1	Nt2/Nc2	Nt1/Nt	Nt2/Nt	Nc1/Nc	Nc2/Nc	Nt/Nc	Relative risk RR	RR%	Magnitude of change D	D%	Odds ratio OR	OR%	Disparity distance RR-D, %	Disparity distance OR-D, %	Disparity RR-OR, %
426	751	1177	452	385	837	0.567244	1.17403	0.942478	1.95065	0.361937	0.638063	0.540024	0.459976	1.40621	0.670224	-32.9776	-0.0575221	-5.75221	0.483161	-51.6839	27.2254	45.9317	18.7063
936	266	1202	627	919	1546	3.5188	0.682263	1.49282	0.289445	0.778702	0.221298	0.405563	0.594437	0.77749	1.92005	92.0053	0.492823	49.2823	5.15753	415.753	42.7231	366.471	323.748
390	980	1370	840	631	1471	0.397959	1.33122	0.464286	1.55309	0.284672	0.715328	0.57104	0.42896	0.931339	0.498514	-50.1486	-0.535714	-53.5714	0.298943	-70.1057	3.42284	16.5343	19.9571
816	124	940	367	178	545	6.58065	2.0618	2.22343	0.696629	0.868085	0.131915	0.673394	0.326606	1.72477	1.28912	28.9118	1.22343	122.343	3.1917	219.17	93.4315	96.8269	190.258
699	180	879	712	715	1427	3.88333	0.995804	0.981742	0.251748	0.795222	0.204778	0.498949	0.501051	0.615978	1.59379	59.3794	-0.0182584	-1.82584	3.8997	289.97	61.2053	291.795	230.59
148	543	691	504	261	765	0.27256	1.93103	0.293651	2.08046	0.214182	0.785818	0.658824	0.341176	0.903268	0.325098	-67.4902	-0.706349	-70.6349	0.141147	-85.8853	3.14474	15.2504	18.3951
225	684	909	857	294	1151	0.328947	2.91497	0.262544	2.32653	0.247525	0.752475	0.74457	0.25543	0.789748	0.33244	-66.756	-0.737456	-73.7456	0.112848	-88.7152	6.98961	14.9696	21.9592
42	181	223	108	8	116	0.232044	13.5	0.388889	22.625	0.188341	0.811659	0.931034	0.0689655	1.92241	0.202292	-79.7708	-0.611111	-61.1111	0.0171885	-98.2812	18.6597	37.17	18.5104
268	165	433	601	454	1055	1.62424	1.32379	0.445923	0.363436	0.618938	0.381062	0.569668	0.430332	0.410427	1.08649	8.64879	-0.554077	-55.4077	1.22697	22.6965	64.0564	78.1042	14.0477
432	324	756	7	265	272	1.33333	0.0264151	61.7143	1.22264	0.571429	0.428571	0.0257353	0.974265	2.77941	22.2041	2120.41	60.7143	6071.43	50.4762	4947.62	3951.02	1123.81	2827.21
479	289	768	218	969	1187	1.65744	0.224974	2.19725	0.298246	0.623698	0.376302	0.183656	0.816344	0.647009	3.39601	239.601	1.19725	119.725	7.36724	636.724	119.876	516.999	397.124
680	864	1544	293	477	770	0.787037	0.614256	2.32082	1.81132	0.440415	0.559585	0.380519	0.619481	2.00519	1.1574	15.7403	1.32082	132.082	1.28129	28.1286	116.342	103.953	12.3882
418	149	567	32	683	715	2.80537	0.0468521	13.0625	0.218155	0.737213	0.262787	0.0447552	0.955245	0.793007	16.4721	1547.21	12.0625	1206.25	59.8771	5887.71	340.961	4681.46	4340.5
662	856	1518	512	998	1510	0.773364	0.513026	1.29297	0.857715	0.4361	0.5639	0.339073	0.660927	1.0053	1.28615	28.6155	0.292969	29.2969	1.50746	50.7457	0.681406	21.4488	22.1302
709	603	1312	582	609	1191	1.17579	0.955665	1.21821	0.990148	0.540396	0.459604	0.488665	0.511335	1.1016	1.10586	10.5863	0.218213	21.8213	1.23033	23.0335	11.235	1.21215	12.4472
477	499	976	508	28	536	0.955912	18.1429	0.938976	17.8214	0.48873	0.51127	0.947761	0.0522388	1.8209	0.515667	-48.4333	-0.0610236	-6.10236	0.0526881	-94.7312	42.3309	88.6288	46.2979
456	1	457	105	850	955	456	0.123529	4.34286	0.00117647	0.997812	0.00218818	0.109948	0.890052	0.478534	9.07534	807.534	3.34286	334.286	3691.43	369043	473.248	368709	368235
17	918	935	121	284	405	0.0185185	0.426056	0.140496	3.23239	0.0181818	0.981818	0.298765	0.701235	2.30864	0.0608565	-93.9144	-0.859504	-85.9504	0.043465	-95.6535	7.96394	9.70309	1.73915
26	968	994	399	177	576	0.0268595	2.25424	0.0651629	5.46893	0.0261569	0.973843	0.692708	0.307292	1.72569	0.0377604	-96.224	-0.934837	-93.4837	0.0119151	-98.8085	2.74025	5.32478	2.58453
200	109	309	701	409	1110	1.83486	1.71394	0.285307	0.266504	0.647249	0.352751	0.631532	0.368468	0.278378	1.02489	2.48882	-0.714693	-71.4693	1.07055	7.05545	73.9581	78.5248	4.56664
562	300	862	19	313	332	1.87333	0.0607029	29.5789	0.958466	0.651972	0.348028	0.0572289	0.942771	2.59639	11.3924	1039.24	28.5789	2857.89	30.8607	2986.07	1818.66	128.175	1946.83
741	850	1591	900	100	1000	0.871765	9	0.823333	8.5	0.465745	0.534255	0.9	0.1	1.591	0.517494	-48.2506	-0.176667	-17.6667	0.0968627	-90.3137	30.5839	72.6471	42.0631
165	220	385	91	806	897	0.75	0.112903	1.81319	0.272953	0.428571	0.571429	0.101449	0.898551	0.429208	4.22449	322.449	0.813187	81.3187	6.64286	564.286	241.13	482.967	241.837
426	52	478	262	323	585	8.19231	0.811146	1.62595	0.160991	0.891213	0.108787	0.447863	0.552137	0.817094	1.98992	98.9923	0.625954	62.5954	10.0997	909.968	36.3969	847.372	810.975
653	283	936	401	128	529	2.30742	3.13281	1.62843	2.21094	0.69765	0.30235	0.758034	0.241966	1.76938	0.920341	-7.96593	0.628429	62.8429	0.736533	-26.3467	70.8088	89.1896	18.3807
376	834	1210	741	621	1362	0.450839	1.19324	0.507422	1.343	0.310744	0.689256	0.544053	0.455947	0.888399	0.571165	-42.8835	-0.492578	-49.2578	0.377829	-62.2171	6.37423	12.9593	19.3336
640	472	1112	298	198	496	1.35593	1.50505	2.14765	2.38384	0.57554	0.42446	0.600806	0.399194	2.24194	0.957945	-4.20549	1.14765	114.765	0.900921	-9.90786	118.971	124.673	5.70237
243	789	1032	785	77	862	0.307985	10.1948	0.309554	10.2468	0.235465	0.764535	0.910673	0.0893271	1.19722	0.258562	-74.1438	-0.690446	-69.0446	0.03021	-96.979	5.09924	27.9344	22.8352
375	383	758	581	495	1076	0.979112	1.17374	0.645439	0.773737	0.494723	0.505277	0.539963	0.460037	0.704461	0.916217	-8.37833	-0.354561	-35.4561	0.834183	-16.5817	27.0778	18.8745	8.20333
984	57	1041	5	487	492	17.2632	0.0102669	196.8	0.117043	0.945245	0.054755	0.0101626	0.989837	2.11585	93.0121	9201.21	195.8	19580	1681.43	168043	10378.8	148463	158842
314	722	1036	145	804	949	0.434903	0.180348	2.16552	0.89801	0.303089	0.696911	0.152792	0.847208	1.09168	1.98366	98.3664	1.16552	116.552	2.41146	141.146	18.1853	24.5945	42.7798
196	347	543	335	609	944	0.564841	0.550082	0.585075	0.569787	0.360958	0.639042	0.354873	0.645127	0.575212	1.01715	1.71463	-0.414925	-41.4925	1.02683	2.68313	43.2072	44.1757	0.968495
855	835	1690	773	249	1022	1.02395	3.10442	1.10608	3.35341	0.505917	0.494083	0.75636	0.24364	1.65362	0.668884	-33.1116	0.10608	10.608	0.329837	-67.0163	43.7196	77.6243	33.9047
599	936	1535	205	440	645	0.639957	0.465909	2.92195	2.12727	0.390228	0.609772	0.317829	0.682171	2.37984	1.22779	22.7791	1.92195	192.195	1.37357	37.3567	169.416	154.838	14.5776
173	470	643	943	820	1763	0.368085	1.15	0.183457	0.573171	0.269051	0.730949	0.534884	0.465116	0.364719	0.503009	-49.6991	-0.816543	-81.6543	0.320074	-67.9926	31.9552	13.6617	18.2935
988	509	1497	946	731	1677	1.94106	1.29412	1.0444	0.696306	0.659987	0.340013	0.564103	0.435897	0.892665	1.16998	16.9976	0.0443975	4.43975	1.49991	49.9911	12.5579	45.5513	32.9934
194	393	587	688	733	1421	0.493639	0.938608	0.281977	0.536153	0.330494	0.669506	0.484166	0.515834	0.413089	0.682605	-31.7395	-0.718023	-71.8023	0.525926	-47.4074	40.0628	24.3949	15.6679
898	805	1703	683	543	1226	1.11553	1.25783	1.31479	1.4825	0.527305	0.472695	0.557096	0.442904	1.38907	0.946524	-5.34764	0.314788	31.4788	0.886869	-11.3131	36.8264	42.7918	5.96544
24	819	843	862	250	1112	0.029304	3.448	0.0278422	3.276	0.0284698	0.97153	0.77518	0.22482	0.758094	0.0367266	-96.3273	-0.972158	-97.2158	0.00849885	-99.1501	0.888441	1.93434	2.82278
472	532	1004	182	837	1019	0.887218	0.217443	2.59341	0.635603	0.47012	0.52988	0.178606	0.821394	0.98528	2.63215	163.215	1.59341	159.341	4.08023	308.023	3.87461	148.682	144.808
589	543	1132	628	579	1207	1.08471	1.08463	0.937898	0.937824	0.520318	0.479682	0.520298	0.479702	0.937862	1.00004	0.00379802	-0.0621019	-6.21019	1.00008	0.0079178	6.21399	6.21811	0.00411977
715	820	1535	426	566	992	0.871951	0.75265	1.6784	1.44876	0.465798	0.534202	0.429435	0.570565	1.54738	1.08468	8.46753	0.678404	67.8404	1.15851	15.8508	59.3728	51.9896	7.38327
253	977	1230	629	602	1231	0.258956	1.04485	0.402226	1.62292	0.205691	0.794309	0.510967	0.489033	0.999188	0.402553	-59.7447	-0.597774	-59.7774	0.24784	-75.216	0.0327013	15.4386	15.4713
925	542	1467	177	448	625	1.70664	0.395089	5.22599	1.20982	0.630539	0.369461	0.2832	0.7168	2.3472	2.22648	122.648	4.22599	422.599	4.31964	331.964	299.951	90.6352	209.316
537	564	1101	879	818	1697	0.952128	1.07457	0.610922	0.689487	0.487738	0.512262	0.517973	0.482027	0.648792	0.941629	-5.83708	-0.389078	-38.9078	0.886053	-11.3947	33.0708	27.5131	5.55764
108	621	729	773	412	1185	0.173913	1.87621	0.139715	1.50728	0.148148	0.851852	0.652321	0.347679	0.61519	0.227109	-77.2891	-0.860285	-86.0285	0.0926936	-90.7306	8.7394	4.70218	13.4416
271	67	338	574	670	1244	4.04478	0.856716	0.472125	0.1	0.801775	0.198225	0.461415	0.538585	0.271704	1.73765	73.7645	-0.527875	-52.7875	4.72125	372.125	126.552	424.913	298.361
55	440	495	604	388	992	0.125	1.5567	0.0910596	1.13402	0.111111	0.888889	0.608871	0.391129	0.498992	0.182487	-81.7513	-0.90894	-90.894	0.080298	-91.9702	9.14275	1.07616	10.2189
509	414	923	546	50	596	1.22947	10.92	0.932234	8.28	0.551463	0.448537	0.916107	0.0838926	1.54866	0.601963	-39.8037	-0.0677656	-6.77656	0.112589	-88.7411	33.0272	81.9646	48.9374
832	367	1199	202	475	677	2.26703	0.425263	4.11881	0.772632	0.693912	0.306088	0.298375	0.701625	1.77105	2.32563	132.563	3.11881	311.881	5.33089	433.089	179.318	121.208	300.525
992	912	1904	38	221	259	1.08772	0.171946	26.1053	4.1267	0.521008	0.478992	0.146718	0.853282	7.35135	3.55108	255.108	25.1053	2510.53	6.32595	532.595	2255.42	1977.93	277.486
381	589	970	380	445	825	0.646859	0.853933	1.00263	1.3236	0.392784	0.607216	0.460606	0.539394	1.17576	0.852754	-14.7246	0.00263158	0.263158	0.757506	-24.2494	14.9878	24.5126	9.52476
92	540	632	377	660	1037	0.17037	0.571212	0.244032	0.818182	0.14557	0.85443	0.363549	0.636451	0.60945	0.400413	-59.9587	-0.755968	-75.5968	0.298261	-70.1739	15.6381	5.42293	10.2152
403	513	916	717	422	1139	0.785575	1.69905	0.562064	1.21564	0.439956	0.560044	0.6295	0.3705	0.804214	0.698899	-30.1101	-0.437936	-43.7936	0.462361	-53.7639	13.6834	9.97034	23.6538
485	372	857	236	506	742	1.30376	0.466403	2.05508	0.735178	0.565928	0.434072	0.318059	0.681941	1.15499	1.77931	77.9315	1.05508	105.508	2.79536	179.536	27.577	74.0272	101.604
207	118	325	644	706	1350	1.75424	0.912181	0.321429	0.167139	0.636923	0.363077	0.477037	0.522963	0.240741	1.33516	33.5165	-0.678571	-67.8571	1.92312	92.3123	101.374	160.169	58.7959
994	376	1370	490	2	492	2.64362	245	2.02857	188	0.725547	0.274453	0.995935	0.00406504	2.78455	0.728509	-27.1491	1.02857	102.857	0.0107903	-98.921	130.006	201.778	71.7719
829	147	976	874	911	1785	5.63946	0.959385	0.948513	0.161361	0.849385	0.150615	0.489636	0.510364	0.546779	1.73473	73.4728	-0.0514874	-5.14874	5.8782	487.82	78.6216	492.968	414.347
782	471	1253	380	354	734	1.6603	1.07345	2.05789	1.33051	0.624102	0.375898	0.517711	0.482289	1.70708	1.2055	20.5503	1.05789	105.789	1.5467	54.6698	85.2392	51.1197	34.1195
223	72	295	79	722	801	3.09722	0.109418	2.82278	0.099723	0.755932	0.244068	0.0986267	0.901373	0.36829	7.66458	666.458	1.82278	182.278	28.3063	2730.63	484.179	2548.35	2064.17
675	626	1301	450	512	962	1.07827	0.878906	1.5	1.22266	0.518832	0.481168	0.467775	0.532225	1.35239	1.10915	10.9147	0.5	50	1.22684	22.6837	39.0853	27.3163	11.769
580	84	664	928	376	1304	6.90476	2.46809	0.625	0.223404	0.873494	0.126506	0.711656	0.288344	0.509202	1.22741	22.741	-0.375	-37.5	2.79762	179.762	60.241	217.262	157.021
437	656	1093	203	647	850	0.666159	0.313756	2.15271	1.01391	0.399817	0.600183	0.238824	0.761176	1.28588	1.67411	67.4111	1.15271	115.271	2.12318	112.318	47.8599	2.95341	44.9065
940	715	1655	881	702	1583	1.31469	1.25499	1.06697	1.01852	0.567976	0.432024	0.556538	0.443462	1.04548	1.02055	2.05514	0.0669694	6.69694	1.04757	4.75699	4.6418	1.93994	2.70186
717	457	1174	165	715	880	1.56893	0.230769	4.34545	0.639161	0.610733	0.389267	0.1875	0.8125	1.33409	3.25724	225.724	3.34545	334.545	6.79869	579.869	108.821	245.323	354.145
198	784	982	754	274	1028	0.252551	2.75182	0.262599	2.86131	0.201629	0.798371	0.733463	0.266537	0.955253	0.2749	-72.51	-0.737401	-73.7401	0.0917758	-90.8224	1.2301	17.0824	18.3125
514	443	957	712	585	1297	1.16027	1.21709	0.72191	0.757265	0.537095	0.462905	0.548959	0.451041	0.737857	0.978388	-2.16119	-0.27809	-27.809	0.953312	-4.66875	25.6478	23.1402	2.50757
259	571	830	703	942	1645	0.45359	0.746285	0.368421	0.606157	0.312048	0.687952	0.427356	0.572644	0.504559	0.730184	-26.9816	-0.631579	-63.1579	0.607798	-39.2202	36.1763	23.9377	12.2386
442	436	878	670	881	1551	1.01376	0.760499	0.659701	0.494892	0.503417	0.496583	0.431979	0.568021	0.566086	1.16537	16.5372	-0.340299	-34.0299	1.33302	33.3021	50.5671	67.3319	16.7648
420	591	1011	967	953	1920	0.71066	1.01469	0.434333	0.620147	0.41543	0.58457	0.503646	0.496354	0.526563	0.824846	-17.5154	-0.565667	-56.5667	0.700371	-29.9629	39.0513	26.6038	12.4475
370	228	598	428	828	1256	1.62281	0.516908	0.864486	0.275362	0.618729	0.381271	0.340764	0.659236	0.476115	1.81571	81.571	-0.135514	-13.5514	3.13945	213.945	95.1224	227.496	132.374
157	4	161	365	696	1061	39.25	0.524425	0.430137	0.00574713	0.975155	0.0248447	0.344015	0.655985	0.151744	2.83463	183.463	-0.569863	-56.9863	74.8438	7384.38	240.449	7441.37	7200.92
886	518	1404	539	875	1414	1.71042	0.616	1.64378	0.592	0.631054	0.368946	0.381188	0.618812	0.992928	1.65549	65.5493	0.643785	64.3785	2.77666	177.666	1.17079	113.288	112.117
573	951	1524	455	757	1212	0.602524	0.601057	1.25934	1.25627	0.375984	0.624016	0.375413	0.624587	1.25743	1.00152	0.152289	0.259341	25.9341	1.00244	0.244046	25.7818	25.69	0.0917575
608	761	1369	139	421	560	0.798949	0.330166	4.3741	1.8076	0.44412	0.55588	0.248214	0.751786	2.44464	1.78926	78.926	3.3741	337.41	2.41984	141.984	258.484	195.426	63.0578
760	181	941	235	10	245	4.1989	23.5	3.23404	18.1	0.807651	0.192349	0.959184	0.0408163	3.84082	0.84202	-15.798	2.23404	223.404	0.178676	-82.1324	239.202	305.537	66.3343
46	540	586	788	766	1554	0.0851852	1.02872	0.0583756	0.704961	0.0784983	0.921502	0.507079	0.492921	0.377091	0.154805	-84.5195	-0.941624	-94.1624	0.0828069	-91.7193	9.64294	2.44313	7.19981
484	302	786	242	533	775	1.60265	0.454034	2	0.566604	0.615776	0.384224	0.312258	0.687742	1.01419	1.97201	97.201	1	100	3.5298	252.98	2.79898	152.98	155.779
736	722	1458	795	973	1768	1.01939	0.817061	0.925786	0.742035	0.504801	0.495199	0.449661	0.550339	0.824661	1.12263	12.2627	-0.0742138	-7.42138	1.24763	24.7631	19.6841	32.1845	12.5005
267	318	585	893	797	1690	0.839623	1.12045	0.298992	0.398996	0.45641	0.54359	0.528402	0.471598	0.346154	0.863755	-13.6245	-0.701008	-70.1008	0.749361	-25.0639	56.4763	45.0369	11.4394
412	792	1204	134	267	401	0.520202	0.501873	3.07463	2.96629	0.342193	0.657807	0.334165	0.665835	3.00249	1.02402	2.40244	2.07463	207.463	1.03652	3.65219	205.06	203.81	1.24975
119	581	700	282	370	652	0.204819	0.762162	0.421986	1.57027	0.17	0.83	0.432515	0.567485	1.07362	0.39305	-60.695	-0.578014	-57.8014	0.268735	-73.1265	2.89362	15.3251	12.4315
601	266	867	933	498	1431	2.2594	1.87349	0.644159	0.534137	0.693195	0.306805	0.651992	0.348008	0.60587	1.0632	6.31961	-0.355841	-35.5841	1.20598	20.5981	41.9037	56.1823	14.2785
491	875	1366	461	651	1112	0.561143	0.708141	1.06508	1.34409	0.359444	0.640556	0.414568	0.585432	1.22842	0.867031	-13.2969	0.0650759	6.50759	0.792416	-20.7584	19.8045	27.2659	7.46146
881	674	1555	567	458	1025	1.30712	1.23799	1.55379	1.47162	0.566559	0.433441	0.553171	0.446829	1.51707	1.0242	2.42037	0.553792	55.3792	1.05584	5.58408	52.9588	49.7951	3.16371
26	903	929	577	877	1454	0.0287929	0.657925	0.0450607	1.02965	0.0279871	0.972013	0.396836	0.603164	0.638927	0.0705255	-92.9474	-0.954939	-95.4939	0.0437632	-95.6237	2.54649	0.129743	2.67623
879	188	1067	86	330	416	4.67553	0.260606	10.2209	0.569697	0.823805	0.176195	0.206731	0.793269	2.5649	3.98492	298.492	9.22093	922.093	17.941	1694.1	623.601	772.006	1395.61
482	969	1451	2	96	98	0.49742	0.0208333	241	10.0938	0.332185	0.667815	0.0204082	0.979592	14.8061	16.2771	1527.71	240	24000	23.8762	2287.62	22472.3	21712.4	759.911
571	479	1050	55	2	57	1.19207	27.5	10.3818	239.5	0.54381	0.45619	0.964912	0.0350877	18.4211	0.563584	-43.6416	9.38182	938.182	0.0433479	-95.6652	981.823	1033.85	52.0237
452	671	1123	150	470	620	0.673621	0.319149	3.01333	1.42766	0.402493	0.597507	0.241935	0.758065	1.81129	1.66364	66.3639	2.01333	201.333	2.11068	111.068	134.969	90.2653	44.7042
683	188	871	803	623	1426	3.63298	1.28892	0.85056	0.301766	0.784156	0.215844	0.563114	0.436886	0.610799	1.39254	39.2536	-0.14944	-14.944	2.81861	181.861	54.1976	196.805	142.608
979	837	1816	176	304	480	1.16965	0.578947	5.5625	2.75329	0.539097	0.460903	0.366667	0.633333	3.78333	1.47026	47.0264	4.5625	456.25	2.02031	102.031	409.224	354.219	55.0046
833	496	1329	517	846	1363	1.67944	0.611111	1.61122	0.586288	0.626787	0.373213	0.37931	0.62069	0.975055	1.65244	65.2439	0.611219	61.1219	2.74817	174.817	4.122	113.695	109.573
573	614	1187	178	320	498	0.933225	0.55625	3.2191	1.91875	0.48273	0.51727	0.35743	0.64257	2.38353	1.35056	35.0558	2.2191	221.91	1.67771	67.7707	186.854	154.139	32.7149
580	596	1176	11	896	907	0.973154	0.0122768	52.7273	0.665179	0.493197	0.506803	0.0121279	0.987872	1.29658	40.6664	3966.64	51.7273	5172.73	79.2678	7826.78	1206.09	2654.06	3860.15
656	409	1065	453	418	871	1.60391	1.08373	1.44812	0.978469	0.615962	0.384038	0.520092	0.479908	1.22273	1.18433	18.4334	0.448124	44.8124	1.47999	47.9989	26.379	3.18658	29.5655
501	680	1181	423	406	829	0.736765	1.04187	1.1844	1.67488	0.424217	0.575783	0.510253	0.489747	1.42461	0.831385	-16.8615	0.184397	18.4397	0.707155	-29.2845	35.3013	47.7242	12.423
901	308	1209	938	874	1812	2.92532	1.07323	0.960554	0.352403	0.745244	0.254756	0.51766	0.48234	0.667219	1.43964	43.964	-0.0394456	-3.94456	2.72573	172.573	47.9085	176.517	128.609
151	484	635	523	55	578	0.311983	9.50909	0.288719	8.8	0.237795	0.762205	0.904844	0.0951557	1.09862	0.262802	-73.7198	-0.711281	-71.1281	0.032809	-96.7191	2.59165	25.591	22.9993
364	811	1175	247	533	780	0.448829	0.463415	1.47368	1.52158	0.309787	0.690213	0.316667	0.683333	1.50641	0.978275	-2.17245	0.473684	47.3684	0.968525	-3.14751	49.5409	50.5159	0.975059
713	882	1595	56	593	649	0.80839	0.0944351	12.7321	1.48735	0.447022	0.552978	0.0862866	0.913713	2.45763	5.18067	418.067	11.7321	1173.21	8.56027	756.027	755.148	417.187	337.961
616	898	1514	352	72	424	0.685969	4.88889	1.75	12.4722	0.406869	0.593131	0.830189	0.169811	3.57075	0.490092	-50.9908	0.75	75	0.140312	-85.9688	125.991	160.969	34.9781
437	645	1082	777	931	1708	0.677519	0.834586	0.56242	0.692803	0.403882	0.596118	0.454918	0.545082	0.633489	0.887812	-11.2188	-0.43758	-43.758	0.811803	-18.8197	32.5392	24.9383	7.60095
991	377	1368	485	937	1422	2.62865	0.517609	2.0433	0.402348	0.724415	0.275585	0.341069	0.658931	0.962025	2.12396	112.396	1.0433	104.33	5.07844	407.844	8.06565	303.514	295.448
97	208	305	948	234	1182	0.466346	4.05128	0.102321	0.888889	0.318033	0.681967	0.80203	0.19797	0.258037	0.396535	-60.3465	-0.897679	-89.7679	0.115111	-88.4889	29.4214	1.27901	28.1424
226	610	836	131	45	176	0.370492	2.91111	1.72519	13.5556	0.270335	0.729665	0.744318	0.255682	4.75	0.363198	-63.6802	0.725191	72.5191	0.127268	-87.2732	136.199	159.792	23.593
590	839	1429	142	412	554	0.703218	0.34466	4.15493	2.03641	0.412876	0.587124	0.256318	0.743682	2.57942	1.6108	61.0798	3.15493	315.493	2.04032	104.032	254.413	211.461	42.9525
239	915	1154	366	425	791	0.261202	0.861176	0.653005	2.15294	0.207106	0.792894	0.462705	0.537295	1.45891	0.447597	-55.2403	-0.346995	-34.6995	0.303309	-69.6691	20.5408	34.9697	14.4289
104	702	806	74	647	721	0.148148	0.114374	1.40541	1.08501	0.129032	0.870968	0.102635	0.897365	1.11789	1.25719	25.7193	0.405405	40.5405	1.2953	29.5295	14.8213	11.011	3.81026
475	993	1468	297	990	1287	0.478348	0.3	1.59933	1.00303	0.323569	0.676431	0.230769	0.769231	1.14064	1.40213	40.2134	0.599327	59.9327	1.59449	59.4495	19.7192	0.48318	19.236
363	337	700	628	926	1554	1.07715	0.678186	0.578025	0.363931	0.518571	0.481429	0.404118	0.595882	0.45045	1.28322	28.3217	-0.421975	-42.1975	1.58828	58.8284	70.5191	101.026	30.5067
335	784	1119	199	168	367	0.427296	1.18452	1.68342	4.66667	0.299374	0.700626	0.542234	0.457766	3.04905	0.552113	-44.7887	0.683417	68.3417	0.360732	-63.9268	113.13	132.268	19.138
5	104	109	602	121	723	0.0480769	4.97521	0.00830565	0.859504	0.0458716	0.954128	0.832642	0.167358	0.150761	0.0550916	-94.4908	-0.991694	-99.1694	0.0096633	-99.0337	4.67859	0.135765	4.54283
660	650	1310	392	758	1150	1.01538	0.51715	1.68367	0.85752	0.503817	0.496183	0.34087	0.65913	1.13913	1.47803	47.8034	0.683673	68.3673	1.96342	96.3422	20.564	27.9749	48.5388
686	601	1287	344	216	560	1.14143	1.59259	1.99419	2.78241	0.533023	0.466977	0.614286	0.385714	2.29821	0.867711	-13.2289	0.994186	99.4186	0.716712	-28.3288	112.647	127.747	15.0999
955	513	1468	107	927	1034	1.8616	0.115426	8.92523	0.553398	0.650545	0.349455	0.103482	0.896518	1.41973	6.28657	528.657	7.92523	792.523	16.1281	1512.81	263.866	720.282	984.148
658	398	1056	193	996	1189	1.65327	0.193775	3.40933	0.399598	0.623106	0.376894	0.162321	0.837679	0.888141	3.83872	283.872	2.40933	240.933	8.53188	753.188	42.9394	512.256	469.316
717	651	1368	197	584	781	1.10138	0.337329	3.63959	1.11473	0.524123	0.475877	0.252241	0.747759	1.7516	2.07787	107.787	2.63959	263.959	3.26501	226.501	156.173	37.4582	118.714
549	923	1472	610	124	734	0.5948	4.91935	0.9	7.44355	0.372962	0.627038	0.831063	0.168937	2.00545	0.448777	-55.1223	-0.1	-10	0.12091	-87.909	45.1223	77.909	32.7867
222	419	641	304	212	516	0.529833	1.43396	0.730263	1.97642	0.346334	0.653666	0.589147	0.410853	1.24225	0.587856	-41.2144	-0.269737	-26.9737	0.369489	-63.0511	14.2407	36.0774	21.8367
44	167	211	828	29	857	0.263473	28.5517	0.0531401	5.75862	0.208531	0.791469	0.966161	0.033839	0.246208	0.215834	-78.4166	-0.94686	-94.686	0.00922792	-99.0772	16.2694	4.39122	20.6606
741	299	1040	200	61	261	2.47826	3.27869	3.705	4.90164	0.7125	0.2875	0.766284	0.233716	3.98467	0.929813	-7.01875	2.705	270.5	0.75587	-24.413	277.519	294.913	17.3943
780	372	1152	754	632	1386	2.09677	1.19304	1.03448	0.588608	0.677083	0.322917	0.544012	0.455988	0.831169	1.24461	24.4612	0.0344828	3.44828	1.75751	75.7508	21.0129	72.3026	51.2896
973	543	1516	621	203	824	1.7919	3.05911	1.56683	2.67488	0.641821	0.358179	0.753641	0.246359	1.83981	0.851627	-14.8373	0.566828	56.6828	0.585757	-41.4243	71.5201	98.1071	26.587
69	161	230	936	958	1894	0.428571	0.977035	0.0737179	0.168058	0.3	0.7	0.494192	0.505808	0.121436	0.607051	-39.2949	-0.926282	-92.6282	0.438645	-56.1355	53.3333	36.4927	16.8407
779	385	1164	531	114	645	2.02338	4.65789	1.46704	3.37719	0.669244	0.330756	0.823256	0.176744	1.80465	0.812923	-18.7077	0.467043	46.7043	0.434397	-56.5603	65.412	103.265	37.8526
714	982	1696	55	39	94	0.727088	1.41026	12.9818	25.1795	0.420991	0.579009	0.585106	0.414894	18.0426	0.719511	-28.0489	11.9818	1198.18	0.515571	-48.4429	1226.23	1246.62	20.394
436	129	565	245	447	692	3.37984	0.548098	1.77959	0.288591	0.771681	0.228319	0.354046	0.645954	0.816474	2.17961	117.961	0.779592	77.9592	6.16649	516.649	40.0014	438.69	398.689
633	737	1370	692	101	793	0.858887	6.85149	0.91474	7.29703	0.462044	0.537956	0.872636	0.127364	1.72762	0.529481	-47.0519	-0.0852601	-8.52601	0.125358	-87.4642	38.5259	78.9382	40.4123
934	238	1172	988	684	1672	3.92437	1.44444	0.945344	0.347953	0.796928	0.203072	0.590909	0.409091	0.700957	1.34865	34.8648	-0.0546559	-5.46559	2.71687	171.687	40.3304	177.153	136.822
507	613	1120	466	760	1226	0.82708	0.613158	1.08798	0.806579	0.452679	0.547321	0.380098	0.619902	0.91354	1.19095	19.0953	0.0879828	8.79828	1.34889	34.8886	10.297	26.0903	15.7933
586	910	1496	363	609	972	0.643956	0.596059	1.61433	1.49425	0.391711	0.608289	0.373457	0.626543	1.53909	1.04888	4.88797	0.614325	61.4325	1.08036	8.0356	56.5445	53.3969	3.14764
204	536	740	109	801	910	0.380597	0.13608	1.87156	0.669164	0.275676	0.724324	0.11978	0.88022	0.813187	2.30151	130.151	0.87156	87.156	2.79686	179.686	42.9953	92.5305	49.5352
9	833	842	504	602	1106	0.0108043	0.837209	0.0178571	1.38372	0.0106888	0.989311	0.455696	0.544304	0.761302	0.0234561	-97.6544	-0.982143	-98.2143	0.0129052	-98.7095	0.559891	0.495198	1.05509
822	877	1699	430	620	1050	0.937286	0.693548	1.91163	1.41452	0.483814	0.516186	0.409524	0.590476	1.6181	1.18141	18.1406	0.911628	91.1628	1.35144	35.1436	73.0222	56.0192	17.003
768	713	1481	837	432	1269	1.07714	1.9375	0.917563	1.65046	0.518569	0.481431	0.659574	0.340426	1.16706	0.786217	-21.3783	-0.0824373	-8.24373	0.555943	-44.4057	13.1346	36.162	23.0274
752	554	1306	485	941	1426	1.3574	0.515409	1.55052	0.588735	0.575804	0.424196	0.340112	0.659888	0.915849	1.69298	69.2982	0.550515	55.0515	2.63364	163.364	14.2467	108.312	94.0655
552	899	1451	596	402	998	0.614016	1.48259	0.926174	2.23632	0.380427	0.619573	0.597194	0.402806	1.45391	0.637024	-36.2976	-0.0738255	-7.38255	0.414151	-58.5849	28.915	51.2023	22.2873
437	476	913	709	853	1562	0.918067	0.831184	0.616361	0.55803	0.478642	0.521358	0.453905	0.546095	0.584507	1.0545	5.44973	-0.383639	-38.3639	1.10453	10.4529	43.8136	48.8168	5.00321
819	312	1131	867	727	1594	2.625	1.19257	0.944637	0.429161	0.724138	0.275862	0.543915	0.456085	0.709536	1.33134	33.1345	-0.0553633	-5.53633	2.20112	120.112	38.6708	125.649	86.978
121	279	400	741	475	1216	0.433692	1.56	0.163293	0.587368	0.3025	0.6975	0.609375	0.390625	0.328947	0.49641	-50.359	-0.836707	-83.6707	0.278008	-72.1992	33.3117	11.4715	21.8403
584	765	1349	293	967	1260	0.763399	0.302999	1.99317	0.791107	0.432913	0.567087	0.23254	0.76746	1.07063	1.86167	86.1675	0.993174	99.3174	2.51948	151.948	13.1499	52.6302	65.7801
183	962	1145	524	2	526	0.190229	262	0.349237	481	0.159825	0.840175	0.996198	0.00380228	2.17681	0.160435	-83.9565	-0.650763	-65.0763	0.000726064	-99.9274	18.8801	34.8511	15.9709
688	417	1105	535	433	968	1.64988	1.23557	1.28598	0.963048	0.622624	0.377376	0.552686	0.447314	1.14153	1.12654	12.6543	0.285981	28.5981	1.33532	33.5324	15.9438	4.93422	20.8781
762	642	1404	8	746	754	1.18692	0.0107239	95.25	0.86059	0.542735	0.457265	0.0106101	0.98939	1.86207	51.1528	5015.28	94.25	9425	110.68	10968	4409.72	1542.99	5952.71
550	931	1481	656	20	676	0.590763	32.8	0.838415	46.55	0.371371	0.628629	0.970414	0.0295858	2.19083	0.382693	-61.7307	-0.161585	-16.1585	0.0180111	-98.1989	45.5722	82.0404	36.4682
881	81	962	230	738	968	10.8765	0.311653	3.83043	0.109756	0.9158	0.0841996	0.237603	0.762397	0.993802	3.85433	285.433	2.83043	283.043	34.8995	3389.95	2.38904	3106.91	3104.52
400	353	753	556	194	750	1.13314	2.86598	0.719424	1.81959	0.531208	0.468792	0.741333	0.258667	1.004	0.716558	-28.3442	-0.280576	-28.0576	0.395378	-60.4622	0.286623	32.4047	32.118
990	883	1873	822	364	1186	1.12118	2.25824	1.20438	2.42582	0.528564	0.471436	0.693086	0.306914	1.57926	0.762624	-23.7376	0.20438	20.438	0.496483	-50.3517	44.1756	70.7897	26.6141
828	652	1480	840	852	1692	1.26994	0.985915	0.985714	0.765258	0.559459	0.440541	0.496454	0.503546	0.874704	1.12691	12.6911	-0.0142857	-1.42857	1.28808	28.8081	14.1197	30.2366	16.1169
335	261	596	930	516	1446	1.28352	1.80233	0.360215	0.505814	0.562081	0.437919	0.643154	0.356846	0.412172	0.873945	-12.6055	-0.639785	-63.9785	0.712149	-28.7851	51.373	35.1934	16.1795
400	153	553	366	339	705	2.61438	1.07965	1.0929	0.451327	0.723327	0.276673	0.519149	0.480851	0.784397	1.39329	39.3294	0.0928962	9.28962	2.42152	142.152	30.0398	132.862	102.822
809	730	1539	924	851	1775	1.10822	1.08578	0.875541	0.857814	0.525666	0.474334	0.520563	0.479437	0.867042	1.0098	0.980214	-0.124459	-12.4459	1.02067	2.06651	13.4261	14.5124	1.08629
265	342	607	641	703	1344	0.774854	0.911807	0.413417	0.486486	0.436573	0.563427	0.476935	0.523065	0.451637	0.915374	-8.46263	-0.586583	-58.6583	0.849801	-15.0199	50.1957	43.6384	6.5573
420	792	1212	554	375	929	0.530303	1.47733	0.758123	2.112	0.346535	0.653465	0.59634	0.40366	1.30463	0.581102	-41.8898	-0.241877	-24.1877	0.35896	-64.104	17.702	39.9163	22.2143
429	236	665	565	131	696	1.8178	4.31298	0.759292	1.80153	0.645113	0.354887	0.811782	0.188218	0.95546	0.794688	-20.5312	-0.240708	-24.0708	0.421471	-57.8529	3.53956	33.7821	37.3216
562	576	1138	10	863	873	0.975694	0.0115875	56.2	0.667439	0.493849	0.506151	0.0114548	0.988545	1.30355	43.113	4211.3	55.2	5520	84.2024	8320.24	1308.7	2800.24	4108.94
851	389	1240	301	941	1242	2.18766	0.319872	2.82724	0.41339	0.68629	0.31371	0.242351	0.757649	0.99839	2.8318	183.18	1.82724	182.724	6.83917	583.917	0.456007	401.192	400.736
941	916	1857	671	56	727	1.02729	11.9821	1.40238	16.3571	0.506731	0.493269	0.922971	0.0770289	2.55433	0.549022	-45.0978	0.402385	40.2385	0.0857353	-91.4265	85.3363	131.665	46.3287
485	146	631	99	397	496	3.32192	0.24937	4.89899	0.367758	0.768621	0.231379	0.199597	0.800403	1.27218	3.85087	285.087	3.89899	389.899	13.3212	1232.12	104.812	842.224	947.036
435	680	1115	958	563	1521	0.639706	1.7016	0.454071	1.20782	0.390135	0.609865	0.629849	0.370151	0.73307	0.61941	-38.059	-0.545929	-54.5929	0.375944	-62.4056	16.5339	7.81269	24.3466
356	112	468	359	874	1233	3.17857	0.410755	0.991643	0.128146	0.760684	0.239316	0.29116	0.70884	0.379562	2.6126	161.26	-0.00835655	-0.835655	7.73836	673.836	162.096	674.672	512.576
461	131	592	151	338	489	3.51908	0.446746	3.05298	0.387574	0.778716	0.221284	0.308793	0.691207	1.21063	2.5218	152.18	2.05298	205.298	7.87715	687.715	53.1177	482.417	535.535
511	718	1229	833	955	1788	0.711699	0.872251	0.613445	0.751832	0.415785	0.584215	0.465884	0.534116	0.68736	0.892466	-10.7534	-0.386555	-38.6555	0.815934	-18.4066	27.902	20.2488	7.65321
560	276	836	324	311	635	2.02899	1.0418	1.7284	0.88746	0.669856	0.330144	0.510236	0.489764	1.31654	1.31284	31.2836	0.728395	72.8395	1.94758	94.7576	41.5559	21.9181	63.474
358	927	1285	790	94	884	0.386192	8.40426	0.453165	9.8617	0.278599	0.721401	0.893665	0.106335	1.45362	0.311749	-68.8251	-0.546835	-54.6835	0.045952	-95.4048	14.1416	40.7213	26.5797
805	166	971	5	963	968	4.8494	0.00519211	161	0.172378	0.829042	0.170958	0.00516529	0.994835	1.0031	160.503	15950.3	160	16000	933.994	93299.4	49.7425	77299.4	77349.1
971	951	1922	251	169	420	1.02103	1.48521	3.86853	5.62722	0.505203	0.494797	0.597619	0.402381	4.57619	0.845359	-15.4641	2.86853	286.853	0.687467	-31.2533	302.317	318.106	15.7893
610	611	1221	136	965	1101	0.998363	0.140933	4.48529	0.633161	0.49959	0.50041	0.123524	0.876476	1.10899	4.04448	304.448	3.48529	348.529	7.08398	608.398	44.0815	259.868	303.95
73	16	89	725	288	1013	4.5625	2.51736	0.10069	0.0555556	0.820225	0.179775	0.715696	0.284304	0.0878578	1.14605	14.6052	-0.89931	-89.931	1.81241	81.2414	104.536	171.172	66.6362
272	934	1206	605	284	889	0.291221	2.13028	0.449587	3.28873	0.225539	0.774461	0.68054	0.31946	1.35658	0.331412	-66.8588	-0.550413	-55.0413	0.136705	-86.3295	11.8175	31.2882	19.4707
604	820	1424	462	330	792	0.736585	1.4	1.30736	2.48485	0.424157	0.575843	0.583333	0.416667	1.79798	0.727127	-27.2873	0.307359	30.7359	0.526132	-47.3868	58.0233	78.1227	20.0994
124	285	409	918	337	1255	0.435088	2.72404	0.135076	0.845697	0.303178	0.696822	0.731474	0.268526	0.325896	0.414476	-58.5524	-0.864924	-86.4924	0.159722	-84.0278	27.94	2.46455	25.4754
226	691	917	630	548	1178	0.327062	1.14964	0.35873	1.26095	0.246456	0.753544	0.534805	0.465195	0.778438	0.460833	-53.9167	-0.64127	-64.127	0.284492	-71.5508	10.2103	7.42379	17.6341
296	791	1087	731	232	963	0.37421	3.15086	0.404925	3.40948	0.272309	0.727691	0.759086	0.240914	1.12876	0.358733	-64.1267	-0.595075	-59.5075	0.118764	-88.1236	4.6192	28.616	23.9969
933	276	1209	248	791	1039	3.38043	0.313527	3.7621	0.348925	0.771712	0.228288	0.238691	0.761309	1.16362	3.2331	223.31	2.7621	276.21	10.782	978.195	52.8996	701.985	754.885
89	75	164	803	757	1560	1.18667	1.06077	0.110834	0.0990753	0.542683	0.457317	0.514744	0.485256	0.105128	1.05428	5.42782	-0.889166	-88.9166	1.11869	11.8688	94.3444	100.785	6.44101
741	348	1089	593	229	822	2.12931	2.58952	1.24958	1.51965	0.680441	0.319559	0.721411	0.278589	1.32482	0.943208	-5.67921	0.249578	24.9578	0.82228	-17.772	30.637	42.7298	12.0928
276	987	1263	556	416	972	0.279635	1.33654	0.496403	2.3726	0.218527	0.781473	0.572016	0.427984	1.29938	0.38203	-61.797	-0.503597	-50.3597	0.209224	-79.0776	11.4373	28.7179	17.2806
778	358	1136	901	724	1625	2.17318	1.24448	0.863485	0.494475	0.684859	0.315141	0.554462	0.445538	0.699077	1.23518	23.5179	-0.136515	-13.6515	1.74627	74.6266	37.1694	88.2781	51.1087
24	226	250	952	211	1163	0.106195	4.51185	0.0252101	1.07109	0.096	0.904	0.818573	0.181427	0.214961	0.117277	-88.2723	-0.97479	-97.479	0.0235368	-97.6463	9.20672	0.167324	9.37405
583	499	1082	881	880	1761	1.16834	1.00114	0.661748	0.567045	0.538817	0.461183	0.500284	0.499716	0.614424	1.07702	7.70224	-0.338252	-33.8252	1.16701	16.7011	41.5274	50.5263	8.99881
693	841	1534	651	893	1544	0.824019	0.729003	1.06452	0.941769	0.45176	0.54824	0.421632	0.578368	0.993523	1.07146	7.14556	0.0645161	6.45161	1.13034	13.0336	0.693948	6.58203	5.88808
925	353	1278	394	557	951	2.6204	0.707361	2.34772	0.633752	0.723787	0.276213	0.414301	0.585699	1.34385	1.74701	74.7009	1.34772	134.772	3.70447	270.447	60.0707	135.675	195.746
265	359	624	299	934	1233	0.738162	0.320128	0.886288	0.384368	0.424679	0.575321	0.242498	0.757502	0.506083	1.75127	75.127	-0.113712	-11.3712	2.30583	130.583	86.4983	141.954	55.4559
898	404	1302	451	112	563	2.22277	4.02679	1.99113	3.60714	0.689708	0.310292	0.801066	0.198934	2.31261	0.860988	-13.9012	0.991131	99.1131	0.551997	-44.8003	113.014	143.913	30.8992
552	813	1365	265	917	1182	0.678967	0.288986	2.08302	0.886587	0.404396	0.595604	0.224196	0.775804	1.15482	1.80376	80.3757	1.08302	108.302	2.34948	134.948	27.9262	26.6462	54.5724
206	3	209	146	776	922	68.6667	0.188144	1.41096	0.00386598	0.985646	0.0143541	0.158351	0.841649	0.226681	6.22442	522.442	0.410959	41.0959	364.968	36396.8	481.346	36355.7	35874.4
927	386	1313	989	316	1305	2.40155	3.12975	0.93731	1.22152	0.706017	0.293983	0.757854	0.242146	1.00613	0.931599	-6.84005	-0.0626896	-6.26896	0.767332	-23.2668	0.571095	16.9979	16.4268
181	968	1149	652	395	1047	0.186983	1.65063	0.277607	2.45063	0.157528	0.842472	0.622732	0.377268	1.09742	0.252963	-74.7037	-0.722393	-72.2393	0.11328	-88.672	2.4644	16.4327	13.9684
125	937	1062	491	355	846	0.133404	1.3831	0.254582	2.63944	0.117702	0.882298	0.580378	0.419622	1.25532	0.202803	-79.7197	-0.745418	-74.5418	0.0964533	-90.3547	5.17795	15.8129	10.635
116	233	349	541	135	676	0.497854	4.00741	0.214418	1.72593	0.332378	0.667622	0.800296	0.199704	0.516272	0.415319	-58.4681	-0.785582	-78.5582	0.124233	-87.5767	20.0901	9.01843	29.1086
529	742	1271	545	4	549	0.712938	136.25	0.970642	185.5	0.416208	0.583792	0.992714	0.00728597	2.31512	0.419262	-58.0738	-0.0293578	-2.93578	0.00523257	-99.4767	55.138	96.541	41.403
444	90	534	726	944	1670	4.93333	0.769068	0.61157	0.095339	0.831461	0.168539	0.434731	0.565269	0.31976	1.91259	91.2589	-0.38843	-38.843	6.41469	541.469	130.102	580.312	450.21
19	311	330	927	36	963	0.0610932	25.75	0.0204962	8.63889	0.0575758	0.942424	0.962617	0.0373832	0.342679	0.0598117	-94.0188	-0.979504	-97.9504	0.00237255	-99.7627	3.93155	1.81237	5.74392
446	845	1291	421	168	589	0.527811	2.50595	1.05938	5.02976	0.345469	0.654531	0.714771	0.285229	2.19185	0.483328	-51.6672	0.0593824	5.93824	0.210623	-78.9377	57.6055	84.876	27.2705
512	663	1175	431	918	1349	0.772247	0.469499	1.18794	0.722222	0.435745	0.564255	0.319496	0.680504	0.871016	1.36385	36.3851	0.187935	18.7935	1.64483	64.4833	17.5915	45.6898	28.0983
605	396	1001	27	53	80	1.52778	0.509434	22.4074	7.4717	0.604396	0.395604	0.3375	0.6625	12.5125	1.7908	79.0802	21.4074	2140.74	2.99897	199.897	2061.66	1940.84	120.817
23	971	994	110	123	233	0.0236869	0.894309	0.209091	7.89431	0.0231388	0.976861	0.472103	0.527897	4.26609	0.0490123	-95.0988	-0.790909	-79.0909	0.0264863	-97.3514	16.0079	18.2605	2.2526
522	510	1032	528	897	1425	1.02353	0.588629	0.988636	0.568562	0.505814	0.494186	0.370526	0.629474	0.724211	1.36512	36.5123	-0.0113636	-1.13636	1.73884	73.8837	37.6487	75.0201	37.3714
120	804	924	288	148	436	0.149254	1.94595	0.416667	5.43243	0.12987	0.87013	0.66055	0.33945	2.11927	0.196609	-80.3391	-0.583333	-58.3333	0.0766998	-92.33	22.0058	33.9967	11.9909
12	249	261	520	793	1313	0.0481928	0.655738	0.0230769	0.313997	0.045977	0.954023	0.39604	0.60396	0.198781	0.116092	-88.3908	-0.976923	-97.6923	0.073494	-92.6506	9.3015	5.04171	4.2598
142	918	1060	681	730	1411	0.154684	0.932877	0.208517	1.25753	0.133962	0.866038	0.482636	0.517364	0.75124	0.277564	-72.2436	-0.791483	-79.1483	0.165814	-83.4186	6.90466	4.27028	11.1749
420	211	631	389	295	684	1.99052	1.31864	1.07969	0.715254	0.66561	0.33439	0.568713	0.431287	0.922515	1.17038	17.0379	0.0796915	7.96915	1.50952	50.9521	9.06872	42.983	33.9143
169	31	200	414	282	696	5.45161	1.46809	0.408213	0.109929	0.845	0.155	0.594828	0.405172	0.287356	1.42058	42.058	-0.591787	-59.1787	3.71342	271.342	101.237	330.52	229.284
463	745	1208	635	2	637	0.621477	317.5	0.729134	372.5	0.383278	0.616722	0.99686	0.00313972	1.89639	0.384485	-61.5515	-0.270866	-27.0866	0.00195741	-99.8043	34.4649	72.7176	38.2528
919	196	1115	6	451	457	4.68878	0.0133038	153.167	0.43459	0.824215	0.175785	0.0131291	0.986871	2.43982	62.7777	6177.77	152.167	15216.7	352.44	35144	9038.89	19927.3	28966.2
744	27	771	603	355	958	27.5556	1.69859	1.23383	0.0760563	0.964981	0.0350195	0.629436	0.370564	0.804802	1.53309	53.3087	0.233831	23.3831	16.2226	1522.26	29.9256	1498.88	1468.95
791	591	1382	155	51	206	1.33841	3.03922	5.10323	11.5882	0.572359	0.427641	0.752427	0.247573	6.70874	0.760683	-23.9317	4.10323	410.323	0.44038	-55.962	434.254	466.285	32.0304
264	232	496	348	701	1049	1.13793	0.496434	0.758621	0.330956	0.532258	0.467742	0.331745	0.668255	0.472831	1.60442	60.4422	-0.241379	-24.1379	2.29221	129.221	84.5801	153.359	68.779
214	49	263	716	623	1339	4.36735	1.14928	0.298883	0.0786517	0.813688	0.186312	0.534727	0.465273	0.196415	1.52169	52.1688	-0.701117	-70.1117	3.80008	280.008	122.281	350.12	227.839
481	468	949	363	176	539	1.02778	2.0625	1.32507	2.65909	0.506849	0.493151	0.673469	0.326531	1.76067	0.752594	-24.7406	0.325069	32.5069	0.498316	-50.1684	57.2474	82.6752	25.4278
994	192	1186	820	563	1383	5.17708	1.45648	1.2122	0.34103	0.838111	0.161889	0.592914	0.407086	0.857556	1.41355	41.3546	0.212195	21.2195	3.55451	255.451	20.1351	234.231	214.096
275	791	1066	707	201	908	0.347661	3.51741	0.388967	3.93532	0.257974	0.742026	0.778634	0.221366	1.17401	0.331316	-66.8684	-0.611033	-61.1033	0.09884	-90.116	5.76518	29.0127	23.2476
744	562	1306	7	680	687	1.32384	0.0102941	106.286	0.826471	0.569678	0.430322	0.0101892	0.989811	1.90102	55.9099	5490.99	105.286	10528.6	128.602	12760.2	5037.58	2231.62	7269.21
747	868	1615	957	687	1644	0.860599	1.39301	0.780564	1.26346	0.462539	0.537461	0.582117	0.417883	0.98236	0.794581	-20.5419	-0.219436	-21.9436	0.617797	-38.2203	1.40163	16.2767	17.6784
360	90	450	628	102	730	4	6.15686	0.573248	0.882353	0.8	0.2	0.860274	0.139726	0.616438	0.929936	-7.00637	-0.426752	-42.6752	0.649682	-35.0318	35.6688	7.64331	28.0255
96	912	1008	245	198	443	0.105263	1.23737	0.391837	4.60606	0.0952381	0.904762	0.553047	0.446953	2.2754	0.172206	-82.7794	-0.608163	-60.8163	0.0850698	-91.493	21.9631	30.6767	8.71362
161	292	453	199	11	210	0.55137	18.0909	0.809045	26.5455	0.355408	0.644592	0.947619	0.052381	2.15714	0.375054	-62.4946	-0.190955	-19.0955	0.0304777	-96.9522	43.3991	77.8567	34.4576
374	764	1138	26	581	607	0.489529	0.0447504	14.3846	1.31497	0.328647	0.671353	0.0428336	0.957166	1.87479	7.67264	667.264	13.3846	1338.46	10.9391	993.909	671.198	344.553	326.645
45	965	1010	330	781	1111	0.0466321	0.422535	0.136364	1.2356	0.0445545	0.955446	0.29703	0.70297	0.909091	0.15	-85	-0.863636	-86.3636	0.110363	-88.9637	1.36364	2.60009	3.96373
637	443	1080	788	306	1094	1.43792	2.57516	0.808376	1.44771	0.589815	0.410185	0.720293	0.279707	0.987203	0.818855	-18.1145	-0.191624	-19.1624	0.558381	-44.1619	1.04789	24.9994	26.0473
621	684	1305	264	242	506	0.907895	1.09091	2.35227	2.82645	0.475862	0.524138	0.521739	0.478261	2.57905	0.912069	-8.7931	1.35227	135.227	0.832237	-16.7763	144.02	152.004	7.98321
95	706	801	350	63	413	0.134561	5.55556	0.271429	11.2063	0.118602	0.881398	0.847458	0.152542	1.93947	0.13995	-86.005	-0.728571	-72.8571	0.024221	-97.5779	13.1479	24.7208	11.5729
566	946	1512	439	352	791	0.598309	1.24716	1.28929	2.6875	0.374339	0.625661	0.554994	0.445006	1.9115	0.674492	-32.5508	0.289294	28.9294	0.479737	-52.0263	61.4802	80.9557	19.4754
789	621	1410	937	237	1174	1.27053	3.95359	0.842049	2.62025	0.559574	0.440426	0.798126	0.201874	1.20102	0.70111	-29.889	-0.157951	-15.7951	0.321362	-67.8638	14.0939	52.0687	37.9749
235	457	692	250	141	391	0.514223	1.77305	0.94	3.24113	0.339595	0.660405	0.639386	0.360614	1.76982	0.531127	-46.8873	-0.06	-6	0.290022	-70.9978	40.8873	64.9978	24.1105
389	743	1132	762	564	1326	0.523553	1.35106	0.510499	1.31738	0.34364	0.65636	0.574661	0.425339	0.853695	0.597987	-40.2013	-0.489501	-48.9501	0.387512	-61.2488	8.74883	12.2987	21.0475
192	645	837	42	770	812	0.297674	0.0545455	4.57143	0.837662	0.229391	0.770609	0.0517241	0.948276	1.03079	4.43489	343.489	3.57143	357.143	5.45736	445.736	13.6542	88.5936	102.248
856	343	1199	134	247	381	2.49563	0.54251	6.38806	1.38866	0.713928	0.286072	0.351706	0.648294	3.14698	2.0299	102.99	5.38806	538.806	4.60015	360.015	435.816	178.791	257.025
308	389	697	308	465	773	0.791774	0.662366	1	0.836559	0.441894	0.558106	0.398448	0.601552	0.901682	1.10904	10.9039	0	0	1.19537	19.5373	10.9039	19.5373	8.6334
586	476	1062	622	716	1338	1.23109	0.868715	0.942122	0.664804	0.551789	0.448211	0.464873	0.535127	0.793722	1.18697	18.6968	-0.0578778	-5.78778	1.41714	41.7142	24.4845	47.502	23.0174
365	455	820	369	281	650	0.802198	1.31317	0.98916	1.61922	0.445122	0.554878	0.567692	0.432308	1.26154	0.78409	-21.591	-0.0108401	-1.08401	0.610888	-38.9112	20.507	37.8272	17.3202
491	809	1300	805	562	1367	0.606922	1.43238	0.609938	1.4395	0.377692	0.622308	0.588881	0.411119	0.950988	0.641373	-35.8627	-0.390062	-39.0062	0.423715	-57.6285	3.14353	18.6223	21.7659
137	122	259	952	203	1155	1.12295	4.68966	0.143908	0.600985	0.528958	0.471042	0.824242	0.175758	0.224242	0.64175	-35.825	-0.856092	-85.6092	0.239453	-76.0547	49.7842	9.55452	40.2297
640	278	918	538	326	864	2.30216	1.65031	1.18959	0.852761	0.697168	0.302832	0.622685	0.377315	1.0625	1.11962	11.9615	0.189591	18.9591	1.39499	39.4988	6.99759	20.5397	27.5373
505	357	862	768	870	1638	1.41457	0.882759	0.657552	0.410345	0.585847	0.414153	0.468864	0.531136	0.526252	1.2495	24.9502	-0.342448	-34.2448	1.60244	60.2438	59.1949	94.4886	35.2936
132	785	917	459	409	868	0.168153	1.12225	0.287582	1.91932	0.143948	0.856052	0.528802	0.471198	1.05645	0.272215	-72.7785	-0.712418	-71.2418	0.149836	-85.0164	1.5367	13.7746	12.2379
762	436	1198	288	364	652	1.74771	0.791209	2.64583	1.1978	0.63606	0.36394	0.441718	0.558282	1.83742	1.43997	43.9969	1.64583	164.583	2.20891	120.891	120.586	43.6927	76.8937
217	54	271	702	861	1563	4.01852	0.815331	0.309117	0.0627178	0.800738	0.199262	0.449136	0.550864	0.173385	1.78284	78.284	-0.690883	-69.0883	4.9287	392.87	147.372	461.958	314.586
784	889	1673	291	598	889	0.88189	0.486622	2.69416	1.48662	0.468619	0.531381	0.327334	0.672666	1.88189	1.43162	43.1624	1.69416	169.416	1.81227	81.2268	126.253	88.189	38.0645
474	624	1098	27	1	28	0.759615	27	17.5556	624	0.431694	0.568306	0.964286	0.0357143	39.2143	0.447683	-55.2317	16.5556	1655.56	0.0281339	-97.1866	1710.79	1752.74	41.9549
558	324	882	470	304	774	1.72222	1.54605	1.18723	1.06579	0.632653	0.367347	0.607235	0.392765	1.13953	1.04186	4.18584	0.187234	18.7234	1.11395	11.3948	14.5376	7.32861	7.20895
211	747	958	824	7	831	0.282463	117.714	0.256068	106.714	0.220251	0.779749	0.991576	0.00842359	1.15283	0.222122	-77.7878	-0.743932	-74.3932	0.00239957	-99.76	3.39464	25.3668	21.9722
251	339	590	230	389	619	0.740413	0.59126	1.0913	0.871465	0.425424	0.574576	0.371567	0.628433	0.95315	1.14494	14.4945	0.0913043	9.13043	1.25226	25.2264	5.36404	16.0959	10.7319
502	894	1396	112	643	755	0.561521	0.174184	4.48214	1.39036	0.359599	0.640401	0.148344	0.851656	1.84901	2.42408	142.408	3.48214	348.214	3.22373	222.373	205.806	125.841	79.9652
457	236	693	742	865	1607	1.93644	0.857803	0.615903	0.272832	0.659452	0.340548	0.46173	0.53827	0.431238	1.42822	42.8219	-0.384097	-38.4097	2.25744	125.744	81.2316	164.154	82.9222
286	159	445	6	275	281	1.79874	0.0218182	47.6667	0.578182	0.642697	0.357303	0.0213523	0.978648	1.58363	30.0996	2909.96	46.6667	4666.67	82.4423	8144.23	1756.7	3477.57	5234.27
818	965	1783	473	466	939	0.847668	1.01502	1.72939	2.07082	0.458777	0.541223	0.503727	0.496273	1.89883	0.910765	-8.92348	0.729387	72.9387	0.835124	-16.4876	81.8622	89.4263	7.56415
587	172	759	756	811	1567	3.41279	0.932182	0.776455	0.212084	0.773386	0.226614	0.482451	0.517549	0.484365	1.60304	60.3037	-0.223545	-22.3545	3.66108	266.108	82.6582	288.462	205.804
292	742	1034	126	40	166	0.393531	3.15	2.31746	18.55	0.282398	0.717602	0.759036	0.240964	6.22892	0.372049	-62.7951	1.31746	131.746	0.12493	-87.507	194.541	219.253	24.7118
212	292	504	800	459	1259	0.726027	1.74292	0.265	0.636166	0.420635	0.579365	0.635425	0.364575	0.400318	0.661974	-33.8026	-0.735	-73.5	0.416558	-58.3442	39.6974	15.1558	24.5416
577	513	1090	247	438	685	1.12476	0.563927	2.33603	1.17123	0.529358	0.470642	0.360584	0.639416	1.59124	1.46806	46.8057	1.33603	133.603	1.99451	99.4507	86.7975	34.1525	52.645
139	390	529	523	166	689	0.35641	3.1506	0.265774	2.3494	0.26276	0.73724	0.759071	0.240929	0.767779	0.34616	-65.384	-0.734226	-73.4226	0.113124	-88.6876	8.03854	15.265	23.3035
865	692	1557	174	247	421	1.25	0.704453	4.97126	2.80162	0.555556	0.444444	0.413302	0.586698	3.69834	1.34419	34.4189	3.97126	397.126	1.77443	77.4425	362.708	319.684	43.0236
325	203	528	449	685	1134	1.60099	0.655474	0.723831	0.29635	0.61553	0.38447	0.395944	0.604056	0.465608	1.55459	55.4591	-0.276169	-27.6169	2.44248	144.248	83.076	171.865	88.7892
685	768	1453	375	946	1321	0.891927	0.396406	1.82667	0.811839	0.471438	0.528562	0.283876	0.716124	1.09992	1.66072	66.072	0.826667	82.6667	2.25003	125.003	16.5946	42.3368	58.9314
476	140	616	435	322	757	3.4	1.35093	1.09425	0.434783	0.772727	0.227273	0.574637	0.425363	0.813738	1.34472	34.4723	0.0942529	9.42529	2.51678	151.678	25.047	142.253	117.206
362	959	1321	474	553	1027	0.377477	0.857143	0.763713	1.73418	0.274035	0.725965	0.461538	0.538462	1.28627	0.593742	-40.6258	-0.236287	-23.6287	0.440389	-55.9611	16.9971	32.3324	15.3353
461	960	1421	826	326	1152	0.480208	2.53374	0.558111	2.94479	0.324419	0.675581	0.717014	0.282986	1.23351	0.452459	-54.7541	-0.441889	-44.1889	0.189525	-81.0475	10.5652	36.8586	26.2934
912	252	1164	485	546	1031	3.61905	0.888278	1.88041	0.461538	0.783505	0.216495	0.470417	0.529583	1.129	1.66555	66.5554	0.880412	88.0412	4.07423	307.423	21.4858	219.381	240.867
631	119	750	4	129	133	5.30252	0.0310078	157.75	0.922481	0.841333	0.158667	0.0300752	0.969925	5.6391	27.9743	2697.43	156.75	15675	171.006	17000.6	12977.6	1325.63	14303.2
273	788	1061	528	928	1456	0.346447	0.568966	0.517045	0.849138	0.257304	0.742696	0.362637	0.637363	0.728709	0.709536	-29.0464	-0.482955	-48.2955	0.608906	-39.1094	19.2491	9.18609	10.063
398	252	650	110	711	821	1.57937	0.154712	3.61818	0.35443	0.612308	0.387692	0.133983	0.866017	0.791717	4.57004	357.004	2.61818	261.818	10.2084	920.844	95.186	659.026	563.84
746	411	1157	186	979	1165	1.81509	0.18999	4.01075	0.419816	0.644771	0.355229	0.159657	0.840343	0.993133	4.03848	303.848	3.01075	301.075	9.55359	855.359	2.77321	554.284	551.511
860	134	994	555	153	708	6.41791	3.62745	1.54955	0.875817	0.865191	0.134809	0.783898	0.216102	1.40395	1.1037	10.3703	0.54955	54.955	1.76926	76.9262	44.5846	21.9712	66.5558
141	524	665	655	937	1592	0.269084	0.699039	0.215267	0.559232	0.21203	0.78797	0.411432	0.588568	0.417714	0.515346	-48.4654	-0.784733	-78.4733	0.384934	-61.5066	30.0079	16.9667	13.0413
632	563	1195	668	305	973	1.12256	2.19016	0.946108	1.8459	0.52887	0.47113	0.686536	0.313464	1.22816	0.770346	-22.9654	-0.0538922	-5.38922	0.512545	-48.7455	17.5762	43.3563	25.78
483	214	697	666	650	1316	2.25701	1.02462	0.725225	0.329231	0.69297	0.30703	0.506079	0.493921	0.529635	1.36929	36.9292	-0.274775	-27.4775	2.20279	120.279	64.4067	147.756	83.3495
304	332	636	527	696	1223	0.915663	0.757184	0.57685	0.477011	0.477987	0.522013	0.430908	0.569092	0.520033	1.10926	10.9257	-0.42315	-42.315	1.2093	20.93	53.2407	63.245	10.0043
291	705	996	505	109	614	0.412766	4.63303	0.576238	6.46789	0.292169	0.707831	0.822476	0.177524	1.62215	0.355231	-64.4769	-0.423762	-42.3762	0.0890921	-91.0908	22.1007	48.7146	26.6139
806	428	1234	582	851	1433	1.88318	0.683901	1.38488	0.502938	0.65316	0.34684	0.406141	0.593859	0.86113	1.60821	60.8211	0.38488	38.488	2.75358	175.358	22.3331	136.87	114.537
635	665	1300	632	891	1523	0.954887	0.709315	1.00475	0.746352	0.488462	0.511538	0.41497	0.58503	0.853578	1.1771	17.71	0.00474684	0.474684	1.34621	34.621	17.2353	34.1463	16.911
646	177	823	55	490	545	3.64972	0.112245	11.7455	0.361224	0.784933	0.215067	0.100917	0.899083	1.51009	7.77797	677.797	10.7455	1074.55	32.5157	3151.57	396.748	2077.02	2473.77
587	667	1254	458	357	815	0.88006	1.28291	1.28166	1.86835	0.468102	0.531898	0.561963	0.438037	1.53865	0.832976	-16.7024	0.281659	28.1659	0.685986	-31.4014	44.8683	59.5674	14.6991
605	991	1596	457	592	1049	0.610494	0.771959	1.32385	1.67399	0.379073	0.620927	0.435653	0.564347	1.52145	0.870125	-12.9875	0.323851	32.3851	0.790837	-20.9163	45.3726	53.3014	7.92878
110	993	1103	813	741	1554	0.110775	1.09717	0.135301	1.34008	0.099728	0.900272	0.523166	0.476834	0.709781	0.190624	-80.9376	-0.864699	-86.4699	0.100965	-89.9035	5.53227	3.43363	8.9659
961	163	1124	952	925	1877	5.89571	1.02919	1.00945	0.176216	0.854982	0.145018	0.507192	0.492808	0.598828	1.68572	68.5716	0.00945378	0.945378	5.7285	472.85	67.6262	471.904	404.278
767	951	1718	158	506	664	0.806519	0.312253	4.85443	1.87945	0.446449	0.553551	0.237952	0.762048	2.58735	1.87622	87.6218	3.85443	385.443	2.5829	158.29	297.821	227.153	70.6687
656	160	816	236	46	282	4.1	5.13043	2.77966	3.47826	0.803922	0.196078	0.836879	0.163121	2.89362	0.960618	-3.93819	1.77966	177.966	0.799153	-20.0847	181.904	198.051	16.1466
527	720	1247	257	194	451	0.731944	1.32474	2.05058	3.71134	0.422614	0.577386	0.569845	0.430155	2.76497	0.74163	-25.837	1.05058	105.058	0.552518	-44.7482	130.895	149.807	18.9112
20	190	210	607	589	1196	0.105263	1.03056	0.0329489	0.322581	0.0952381	0.904762	0.507525	0.492475	0.175585	0.187652	-81.2348	-0.967051	-96.7051	0.102142	-89.7858	15.4703	6.91928	8.55103
879	955	1834	643	451	1094	0.920419	1.42572	1.36703	2.11752	0.47928	0.52072	0.587751	0.412249	1.67642	0.815447	-18.4553	0.36703	36.703	0.645581	-35.4419	55.1582	72.1448	16.9866
79	336	415	139	308	447	0.235119	0.451299	0.568345	1.09091	0.190361	0.809639	0.310962	0.689038	0.928412	0.61217	-38.783	-0.431655	-43.1655	0.520983	-47.9017	4.38242	4.73621	9.11863
507	57	564	134	832	966	8.89474	0.161058	3.78358	0.0685096	0.898936	0.101064	0.138716	0.861284	0.583851	6.48039	548.039	2.78358	278.358	55.227	5422.7	269.681	5144.34	4874.66
275	729	1004	686	636	1322	0.377229	1.07862	0.400875	1.14623	0.273904	0.726096	0.518911	0.481089	0.759455	0.527845	-47.2155	-0.599125	-59.9125	0.349734	-65.0266	12.697	5.11404	17.8111
552	972	1524	384	831	1215	0.567901	0.462094	1.4375	1.16968	0.362205	0.637795	0.316049	0.683951	1.25432	1.14604	14.6038	0.4375	43.75	1.22897	22.8974	29.1462	20.8526	8.29354
478	948	1426	831	729	1560	0.504219	1.13992	0.575211	1.30041	0.335203	0.664797	0.532692	0.467308	0.914103	0.629263	-37.0737	-0.424789	-42.4789	0.44233	-55.767	5.4052	13.2881	18.6933
517	159	676	788	98	886	3.25157	8.04082	0.656091	1.62245	0.764793	0.235207	0.889391	0.110609	0.76298	0.859907	-14.0093	-0.343909	-34.3909	0.404383	-59.5617	20.3815	25.1708	45.5523
212	500	712	214	24	238	0.424	8.91667	0.990654	20.8333	0.297753	0.702247	0.89916	0.10084	2.9916	0.331146	-66.8854	-0.00934579	-0.934579	0.0475514	-95.2449	65.9509	94.3103	28.3594
474	752	1226	472	91	563	0.630319	5.18681	1.00424	8.26374	0.386623	0.613377	0.838366	0.161634	2.17762	0.461163	-53.8837	0.00423729	0.423729	0.121523	-87.8477	54.3074	88.2714	33.9639
699	377	1076	355	597	952	1.85411	0.59464	1.96901	0.631491	0.649628	0.350372	0.372899	0.627101	1.13025	1.7421	74.2102	0.969014	96.9014	3.11804	211.804	22.6912	114.903	137.594
725	10	735	393	486	879	72.5	0.808642	1.84478	0.0205761	0.986395	0.0136054	0.447099	0.552901	0.836177	2.20621	120.621	0.844784	84.4784	89.6565	8865.65	36.1427	8781.17	8745.03
201	574	775	706	738	1444	0.350174	0.95664	0.284703	0.777778	0.259355	0.740645	0.48892	0.51108	0.536704	0.530465	-46.9535	-0.715297	-71.5297	0.366046	-63.3954	24.5763	8.13436	16.4419
624	466	1090	518	579	1097	1.33906	0.894646	1.20463	0.804836	0.572477	0.427523	0.472197	0.527803	0.993619	1.21237	21.2369	0.204633	20.4633	1.49674	49.6744	0.773618	29.2111	28.4374
425	157	582	550	875	1425	2.70701	0.628571	0.772727	0.179429	0.730241	0.269759	0.385965	0.614035	0.408421	1.89199	89.1987	-0.227273	-22.7273	4.3066	330.66	111.926	353.387	241.461
990	503	1493	745	462	1207	1.96819	1.61255	1.32886	1.08874	0.663094	0.336906	0.617233	0.382767	1.23695	1.0743	7.4302	0.328859	32.8859	1.22054	22.0543	25.4557	10.8317	14.6241
76	357	433	481	71	552	0.212885	6.77465	0.158004	5.02817	0.17552	0.82448	0.871377	0.128623	0.78442	0.201428	-79.8572	-0.841996	-84.1996	0.0314238	-96.8576	4.34238	12.658	17.0004
568	735	1303	862	551	1413	0.772789	1.56443	0.658933	1.33394	0.435917	0.564083	0.61005	0.38995	0.922151	0.71456	-28.544	-0.341067	-34.1067	0.493975	-50.6025	5.56275	16.4957	22.0585
580	701	1281	955	398	1353	0.827389	2.3995	0.60733	1.76131	0.452771	0.547229	0.705839	0.294161	0.946785	0.641465	-35.8535	-0.39267	-39.267	0.344818	-65.5182	3.41356	26.2512	29.6648
407	974	1381	72	655	727	0.417864	0.109924	5.65278	1.48702	0.294714	0.705286	0.0990371	0.900963	1.89959	2.97579	197.579	4.65278	465.278	3.80141	280.141	267.699	185.137	82.5613
258	587	845	758	542	1300	0.439523	1.39852	0.340369	1.08303	0.305325	0.694675	0.583077	0.416923	0.65	0.523645	-47.6355	-0.659631	-65.9631	0.314276	-68.5724	18.3276	2.60931	20.9369
990	994	1984	916	206	1122	0.995976	4.4466	1.08079	4.82524	0.498992	0.501008	0.816399	0.183601	1.76827	0.611211	-38.8789	0.080786	8.0786	0.223986	-77.6014	46.9575	85.68	38.7225
313	117	430	931	594	1525	2.67521	1.56734	0.336198	0.19697	0.727907	0.272093	0.610492	0.389508	0.281967	1.19233	19.2329	-0.663802	-66.3802	1.70685	70.685	85.6131	137.065	51.4521
226	433	659	612	485	1097	0.52194	1.26186	0.369281	0.892784	0.342944	0.657056	0.557885	0.442115	0.600729	0.614721	-38.5279	-0.630719	-63.0719	0.413629	-58.6371	24.544	4.43478	20.1092
79	371	450	737	861	1598	0.212938	0.855981	0.107191	0.430894	0.175556	0.824444	0.461202	0.538798	0.281602	0.380648	-61.9352	-0.892809	-89.2809	0.248765	-75.1235	27.3457	14.1573	13.1884
765	247	1012	777	640	1417	3.09717	1.21406	0.984556	0.385937	0.755929	0.244071	0.548342	0.451658	0.714185	1.37857	37.8573	-0.015444	-1.5444	2.55108	155.108	39.4017	156.652	117.25
736	748	1484	511	303	814	0.983957	1.68647	1.44031	2.46865	0.495957	0.504043	0.627764	0.372236	1.8231	0.790037	-20.9963	0.440313	44.0313	0.583442	-41.6558	65.0276	85.6871	20.6595
47	534	581	6	986	992	0.088015	0.00608519	7.83333	0.541582	0.080895	0.919105	0.00604839	0.993952	0.585685	13.3746	1237.46	6.83333	683.333	14.4638	1346.38	554.131	663.046	108.915
3	283	286	413	755	1168	0.0106007	0.54702	0.00726392	0.374834	0.0104895	0.98951	0.353596	0.646404	0.244863	0.0296653	-97.0335	-0.992736	-99.2736	0.019379	-98.0621	2.24013	1.21151	1.02862
208	631	839	205	737	942	0.329635	0.278155	1.01463	0.856174	0.247914	0.752086	0.217622	0.782378	0.890658	1.1392	13.9196	0.0146341	1.46341	1.18508	18.508	12.4562	17.0446	4.58839
327	722	1049	761	676	1437	0.452909	1.12574	0.429698	1.06805	0.311725	0.688275	0.529576	0.470424	0.729993	0.588633	-41.1367	-0.570302	-57.0302	0.402321	-59.7679	15.8935	2.73769	18.6312
783	881	1664	417	743	1160	0.888763	0.561238	1.8777	1.18573	0.470553	0.529447	0.359483	0.640517	1.43448	1.30897	30.8972	0.877698	87.7698	1.58357	58.3575	56.8726	29.4123	27.4603
571	48	619	825	862	1687	11.8958	0.957077	0.692121	0.0556845	0.922456	0.0775444	0.489034	0.510966	0.366924	1.88628	88.6282	-0.307879	-30.7879	12.4293	1142.93	119.416	1173.72	1054.31
836	880	1716	720	331	1051	0.95	2.17523	1.16111	2.65861	0.487179	0.512821	0.685062	0.314938	1.63273	0.711147	-28.8853	0.161111	16.1111	0.436736	-56.3264	44.9964	72.4375	27.4411
121	881	1002	611	144	755	0.137344	4.24306	0.198036	6.11806	0.120758	0.879242	0.809272	0.190728	1.32715	0.149219	-85.0781	-0.801964	-80.1964	0.0323691	-96.7631	4.88173	16.5667	11.685
116	27	143	553	395	948	4.2963	1.4	0.209765	0.0683544	0.811189	0.188811	0.583333	0.416667	0.150844	1.39061	39.0609	-0.790235	-79.0235	3.06878	206.878	118.084	285.902	167.817
439	731	1170	608	783	1391	0.600547	0.776501	0.722039	0.933589	0.375214	0.624786	0.437096	0.562904	0.841121	0.858425	-14.1575	-0.277961	-27.7961	0.773402	-22.6598	13.6385	5.13626	8.50226
701	879	1580	507	575	1082	0.797497	0.881739	1.38264	1.5287	0.443671	0.556329	0.468577	0.531423	1.46026	0.946848	-5.31521	0.382643	38.2643	0.904459	-9.55407	43.5795	47.8184	4.23886
679	765	1444	123	923	1046	0.887582	0.133261	5.52033	0.828819	0.470222	0.529778	0.117591	0.882409	1.3805	3.9988	299.88	4.52033	452.033	6.66047	566.047	152.153	114.015	266.168
701	818	1519	351	394	745	0.856968	0.890863	1.99715	2.07614	0.461488	0.538512	0.471141	0.528859	2.03893	0.979511	-2.04888	0.997151	99.7151	0.961953	-3.80471	101.764	103.52	1.75583
281	930	1211	468	571	1039	0.302151	0.819615	0.600427	1.62872	0.23204	0.76796	0.450433	0.549567	1.16554	0.515148	-48.4852	-0.399573	-39.9573	0.368649	-63.1351	8.52795	23.1778	14.6498
161	248	409	392	140	532	0.649194	2.8	0.410714	1.77143	0.393643	0.606357	0.736842	0.263158	0.768797	0.53423	-46.577	-0.589286	-58.9286	0.231855	-76.8145	12.3516	17.8859	30.2375
447	992	1439	276	267	543	0.450605	1.03371	1.61957	3.71536	0.310632	0.689368	0.508287	0.491713	2.65009	0.611135	-38.8865	0.619565	61.9565	0.435911	-56.4089	100.843	118.365	17.5224
552	395	947	409	150	559	1.39747	2.72667	1.34963	2.63333	0.582893	0.417107	0.731664	0.268336	1.6941	0.796668	-20.3332	0.349633	34.9633	0.512519	-48.7481	55.2965	83.7114	28.4149
86	301	387	537	779	1316	0.285714	0.689345	0.160149	0.386393	0.222222	0.777778	0.408055	0.591945	0.294073	0.544589	-45.5411	-0.839851	-83.9851	0.414472	-58.5528	38.444	25.4323	13.0117
864	372	1236	559	249	808	2.32258	2.24498	1.54562	1.49398	0.699029	0.300971	0.691832	0.308168	1.5297	1.0104	1.04035	0.545617	54.5617	1.03457	3.45663	53.5214	51.1051	2.41629
825	121	946	493	366	859	6.81818	1.34699	1.67343	0.330601	0.872093	0.127907	0.573923	0.426077	1.10128	1.51953	51.9529	0.673428	67.3428	5.06177	406.177	15.3899	338.835	354.224
48	717	765	6	530	536	0.0669456	0.0113208	8	1.35283	0.0627451	0.937255	0.011194	0.988806	1.42724	5.60523	460.523	7	700	5.91353	491.353	239.477	208.647	30.83
646	229	875	444	306	750	2.82096	1.45098	1.45495	0.748366	0.738286	0.261714	0.592	0.408	1.16667	1.2471	24.7104	0.454955	45.4955	1.94418	94.4176	20.7851	48.9221	69.7071
216	984	1200	386	219	605	0.219512	1.76256	0.559585	4.49315	0.18	0.82	0.638017	0.361983	1.98347	0.282124	-71.7876	-0.440415	-44.0415	0.124542	-87.5458	27.7461	43.5044	15.7582
542	724	1266	541	191	732	0.748619	2.83246	1.00185	3.79058	0.42812	0.57188	0.739071	0.260929	1.72951	0.579268	-42.0732	0.00184843	0.184843	0.2643	-73.57	42.2581	73.7549	31.4968
187	773	960	118	138	256	0.241915	0.855072	1.58475	5.60145	0.194792	0.805208	0.460938	0.539062	3.75	0.422599	-57.7401	0.584746	58.4746	0.282917	-71.7083	116.215	130.183	13.9682
153	587	740	956	13	969	0.260647	73.5385	0.160042	45.1538	0.206757	0.793243	0.986584	0.0134159	0.763674	0.209568	-79.0432	-0.839958	-83.9958	0.00354437	-99.6456	4.95265	15.6497	20.6024
890	9	899	248	546	794	98.8889	0.454212	3.58871	0.0164835	0.989989	0.0100111	0.312343	0.687657	1.13224	3.16956	216.956	2.58871	258.871	217.715	21671.5	41.9149	21412.6	21454.5
710	699	1409	411	74	485	1.01574	5.55405	1.72749	9.44595	0.503903	0.496097	0.847423	0.152577	2.90515	0.594631	-40.5369	0.727494	72.7494	0.182882	-81.7118	113.286	154.461	41.1749
879	866	1745	98	966	1064	1.01501	0.101449	8.96939	0.89648	0.503725	0.496275	0.0921053	0.907895	1.64004	5.46901	446.901	7.96939	796.939	10.0051	900.511	350.037	103.573	453.61
853	678	1531	196	503	699	1.25811	0.389662	4.35204	1.34791	0.557152	0.442848	0.280401	0.719599	2.19027	1.98699	98.6987	3.35204	335.204	3.22873	222.873	236.505	112.331	124.174
220	796	1016	965	585	1550	0.276382	1.64957	0.227979	1.36068	0.216535	0.783465	0.622581	0.377419	0.655484	0.347803	-65.2197	-0.772021	-77.2021	0.167548	-83.2452	11.9824	6.04317	18.0255
967	889	1856	901	362	1263	1.08774	2.48895	1.07325	2.4558	0.521013	0.478987	0.713381	0.286619	1.46952	0.730343	-26.9657	0.0732519	7.32519	0.437027	-56.2973	34.2909	63.6225	29.3316
567	110	677	99	938	1037	5.15455	0.105544	5.72727	0.117271	0.837518	0.162482	0.0954677	0.904532	0.652845	8.77279	777.279	4.72727	472.727	48.838	4783.8	304.552	4311.07	4006.52
637	985	1622	78	754	832	0.646701	0.103448	8.16667	1.30637	0.392725	0.607275	0.09375	0.90625	1.94952	4.18907	318.907	7.16667	716.667	6.25144	525.144	397.76	191.523	206.237
428	315	743	724	128	852	1.35873	5.65625	0.59116	2.46094	0.576043	0.423957	0.849765	0.150235	0.872066	0.677885	-32.2115	-0.40884	-40.884	0.240217	-75.9783	8.67247	35.0943	43.7667
815	844	1659	146	533	679	0.96564	0.273921	5.58219	1.58349	0.49126	0.50874	0.215022	0.784978	2.4433	2.28469	128.469	4.58219	458.219	3.52525	252.525	329.75	205.695	124.055
170	185	355	677	44	721	0.918919	15.3864	0.251108	4.20455	0.478873	0.521127	0.938974	0.0610264	0.492372	0.509996	-49.0004	-0.748892	-74.8892	0.0597229	-94.0277	25.8889	19.1385	45.0274
580	304	884	168	811	979	1.90789	0.207152	3.45238	0.374846	0.656109	0.343891	0.171604	0.828396	0.902962	3.82339	282.339	2.45238	245.238	9.21013	821.013	37.1014	575.775	538.674
372	597	969	821	557	1378	0.623116	1.47397	0.453106	1.07181	0.383901	0.616099	0.595791	0.404209	0.703193	0.644355	-35.5645	-0.546894	-54.6894	0.422747	-57.7253	19.1249	3.03589	22.1608
24	331	355	867	543	1410	0.0725076	1.59669	0.0276817	0.609576	0.0676056	0.932394	0.614894	0.385106	0.251773	0.109947	-89.0053	-0.972318	-97.2318	0.0454113	-95.4589	8.22652	1.77296	6.45356
818	301	1119	389	1	390	2.71761	389	2.10283	301	0.73101	0.26899	0.997436	0.0025641	2.86923	0.732889	-26.7111	1.10283	110.283	0.00698614	-99.3014	136.994	209.584	72.5903
330	314	644	282	73	355	1.05096	3.86301	1.17021	4.30137	0.512422	0.487578	0.794366	0.205634	1.81408	0.645071	-35.4929	0.170213	17.0213	0.272056	-72.7944	52.5142	89.8157	37.3015
866	3	869	180	318	498	288.667	0.566038	4.81111	0.00943396	0.996548	0.00345224	0.361446	0.638554	1.74498	2.75712	175.712	3.81111	381.111	509.978	50897.8	205.4	50516.7	50722.1
164	285	449	714	100	814	0.575439	7.14	0.229692	2.85	0.365256	0.634744	0.87715	0.12285	0.551597	0.416412	-58.3588	-0.770308	-77.0308	0.0805936	-91.9406	18.6721	14.9098	33.5819
632	304	936	558	584	1142	2.07895	0.955479	1.13262	0.520548	0.675214	0.324786	0.488616	0.511384	0.819615	1.38189	38.1889	0.132616	13.2616	2.17582	117.582	24.9272	104.32	79.3927
572	266	838	676	661	1337	2.15038	1.02269	0.846154	0.402421	0.682578	0.317422	0.50561	0.49439	0.626776	1.35001	35.0009	-0.153846	-15.3846	2.10266	110.266	50.3855	125.651	75.2651
667	372	1039	980	900	1880	1.79301	1.08889	0.680612	0.413333	0.641963	0.358037	0.521277	0.478723	0.55266	1.23152	23.1522	-0.319388	-31.9388	1.64664	64.6643	55.0909	96.603	41.5121
575	965	1540	974	340	1314	0.595855	2.86471	0.590349	2.83824	0.373377	0.626623	0.741248	0.258752	1.17199	0.503713	-49.6287	-0.409651	-40.9651	0.207999	-79.2001	8.66356	38.235	29.5715
320	945	1265	759	447	1206	0.338624	1.69799	0.421607	2.11409	0.252964	0.747036	0.629353	0.370647	1.04892	0.401943	-59.8057	-0.578393	-57.8393	0.199427	-80.0573	1.96639	22.218	20.2516
348	912	1260	326	132	458	0.381579	2.4697	1.06748	6.90909	0.27619	0.72381	0.71179	0.28821	2.75109	0.388022	-61.1978	0.0674847	6.74847	0.154504	-84.5496	67.9462	91.298	23.3518
679	102	781	980	374	1354	6.65686	2.62032	0.692857	0.272727	0.869398	0.130602	0.723781	0.276219	0.576809	1.20119	20.1189	-0.307143	-30.7143	2.54048	154.048	50.8332	184.762	133.929
591	245	836	155	635	790	2.41224	0.244094	3.8129	0.385827	0.706938	0.293062	0.196203	0.803797	1.05823	3.6031	260.31	2.8129	281.29	9.88242	888.242	20.9801	606.952	627.932
937	992	1929	907	700	1607	0.944556	1.29571	1.03308	1.41714	0.485744	0.514256	0.564406	0.435594	1.20037	0.860629	-13.9371	0.0330761	3.30761	0.728985	-27.1015	17.2447	30.4091	13.1644
947	881	1828	838	501	1339	1.07491	1.67265	1.13007	1.75848	0.518053	0.481947	0.62584	0.37416	1.3652	0.827771	-17.2229	0.130072	13.0072	0.64264	-35.736	30.23	48.7432	18.5131
35	511	546	578	838	1416	0.0684932	0.689737	0.0605536	0.609785	0.0641026	0.935897	0.408192	0.591808	0.385593	0.15704	-84.296	-0.939446	-93.9446	0.0993032	-90.0697	9.64866	3.87496	5.7737
760	151	911	862	25	887	5.03311	34.48	0.881671	6.04	0.834248	0.165752	0.971815	0.0281849	1.02706	0.858443	-14.1557	-0.118329	-11.8329	0.145972	-85.4028	2.32273	73.5699	71.2471
244	321	565	300	611	911	0.760125	0.490998	0.813333	0.525368	0.431858	0.568142	0.329308	0.670692	0.620198	1.31141	31.141	-0.186667	-18.6667	1.54812	54.812	49.8077	73.4787	23.671
609	805	1414	867	402	1269	0.756522	2.15672	0.702422	2.00249	0.430693	0.569307	0.683215	0.316785	1.11426	0.630392	-36.9608	-0.297578	-29.7578	0.350775	-64.9225	7.20306	35.1647	27.9617
221	565	786	551	19	570	0.39115	29	0.401089	29.7368	0.28117	0.71883	0.966667	0.0333333	1.37895	0.290866	-70.9134	-0.598911	-59.8911	0.0134879	-98.6512	11.0223	38.7601	27.7378
836	869	1705	386	619	1005	0.962025	0.623586	2.1658	1.40388	0.490323	0.509677	0.38408	0.61592	1.69652	1.27662	27.6617	1.1658	116.58	1.54273	54.273	88.9186	62.3073	26.6113
281	344	625	289	100	389	0.81686	2.89	0.972318	3.44	0.4496	0.5504	0.742931	0.257069	1.60668	0.605171	-39.4829	-0.0276817	-2.76817	0.282651	-71.7349	36.7147	68.9668	32.252
39	514	553	445	209	654	0.0758755	2.12919	0.0876404	2.45933	0.0705244	0.929476	0.680428	0.319572	0.845566	0.103647	-89.6353	-0.91236	-91.236	0.0356359	-96.4364	1.60067	5.20045	6.80112
10	934	944	993	433	1426	0.0107066	2.2933	0.0100705	2.15704	0.0105932	0.989407	0.696353	0.303647	0.661992	0.0152124	-98.4788	-0.98993	-98.993	0.00466865	-99.5331	0.514193	0.540184	1.05438
555	750	1305	145	125	270	0.74	1.16	3.82759	6	0.425287	0.574713	0.537037	0.462963	4.83333	0.791914	-20.8086	2.82759	282.759	0.637931	-36.2069	303.567	318.966	15.3983
513	622	1135	690	67	757	0.824759	10.2985	0.743478	9.28358	0.451982	0.548018	0.911493	0.0885073	1.49934	0.495871	-50.4129	-0.256522	-25.6522	0.0800853	-91.9915	24.7608	66.3393	41.5785
168	99	267	68	480	548	1.69697	0.141667	2.47059	0.20625	0.629213	0.370787	0.124088	0.875912	0.487226	5.07072	407.072	1.47059	147.059	11.9786	1097.86	260.013	950.802	690.789
796	763	1559	591	313	904	1.04325	1.88818	1.34687	2.4377	0.510584	0.489416	0.653761	0.346239	1.72456	0.780994	-21.9006	0.34687	34.687	0.552517	-44.7483	56.5875	79.4353	22.8478
478	702	1180	407	476	883	0.680912	0.855042	1.17445	1.47479	0.405085	0.594915	0.460929	0.539071	1.33635	0.878845	-12.1155	0.174447	17.4447	0.796349	-20.3651	29.5602	37.8098	8.2496
957	664	1621	159	654	813	1.44127	0.243119	6.01887	1.01529	0.590376	0.409624	0.195572	0.804428	1.99385	3.01872	201.872	5.01887	501.887	5.92822	492.822	300.015	9.06456	290.951
322	121	443	180	412	592	2.66116	0.436893	1.78889	0.293689	0.726862	0.273138	0.304054	0.695946	0.748311	2.39057	139.057	0.788889	78.8889	6.09109	509.109	60.168	430.22	370.052
653	185	838	744	858	1602	3.52973	0.867133	0.877688	0.215618	0.779236	0.220764	0.464419	0.535581	0.523096	1.67787	67.7872	-0.122312	-12.2312	4.07058	307.058	80.0183	319.289	239.27
574	79	653	92	619	711	7.26582	0.148627	6.23913	0.127625	0.87902	0.12098	0.129395	0.870605	0.918425	6.7933	579.33	5.23913	523.913	48.8864	4788.64	55.4165	4264.72	4209.31
90	534	624	801	592	1393	0.168539	1.35304	0.11236	0.902027	0.144231	0.855769	0.575018	0.424982	0.447954	0.250828	-74.9172	-0.88764	-88.764	0.124563	-87.5437	13.8469	1.22038	12.6265
735	409	1144	529	707	1236	1.79707	0.748232	1.38941	0.578501	0.642483	0.357517	0.427994	0.572006	0.925566	1.50115	50.115	0.389414	38.9414	2.40175	140.175	11.1736	101.234	90.06
453	826	1279	702	269	971	0.548426	2.60967	0.645299	3.07063	0.354183	0.645817	0.722966	0.277034	1.3172	0.489903	-51.0097	-0.354701	-35.4701	0.210152	-78.9848	15.5397	43.5147	27.9751
756	575	1331	161	373	534	1.31478	0.431635	4.69565	1.54155	0.567994	0.432006	0.301498	0.698502	2.49251	1.88391	88.3906	3.69565	369.565	3.04605	204.605	281.175	164.96	116.214
182	929	1111	303	389	692	0.19591	0.77892	0.60066	2.38817	0.163816	0.836184	0.437861	0.562139	1.60549	0.374129	-62.5871	-0.39934	-39.934	0.251514	-74.8486	22.6532	34.9146	12.2614
630	814	1444	916	499	1415	0.773956	1.83567	0.687773	1.63126	0.436288	0.563712	0.64735	0.35265	1.02049	0.67396	-32.604	-0.312227	-31.2227	0.42162	-57.838	1.38126	26.6153	25.234
858	146	1004	165	668	833	5.87671	0.247006	5.2	0.218563	0.854582	0.145418	0.198079	0.801921	1.20528	4.31434	331.434	4.2	420	23.7918	2279.18	88.5657	1859.18	1947.74
653	499	1152	715	742	1457	1.30862	0.963612	0.913287	0.672507	0.56684	0.43316	0.490734	0.509266	0.790666	1.15509	15.5086	-0.0867133	-8.67133	1.35803	35.8034	24.1799	44.4747	20.2948
315	640	955	645	105	750	0.492188	6.14286	0.488372	6.09524	0.329843	0.670157	0.86	0.14	1.27333	0.383538	-61.6462	-0.511628	-51.1628	0.0801235	-91.9876	10.4834	40.8249	30.3415
101	889	990	652	228	880	0.113611	2.85965	0.154908	3.89912	0.10202	0.89798	0.740909	0.259091	1.125	0.137696	-86.2304	-0.845092	-84.5092	0.0397289	-96.0271	1.7212	11.5179	9.7967
876	35	911	567	10	577	25.0286	56.7	1.54497	3.5	0.961581	0.0384193	0.982669	0.017331	1.57886	0.97854	-2.14602	0.544974	54.4974	0.441421	-55.8579	56.6434	110.355	53.7119
653	365	1018	205	17	222	1.78904	12.0588	3.18537	21.4706	0.641454	0.358546	0.923423	0.0765766	4.58559	0.694648	-30.5352	2.18537	218.537	0.14836	-85.164	249.072	303.701	54.6288
690	584	1274	608	681	1289	1.18151	0.892805	1.13487	0.857562	0.541601	0.458399	0.471683	0.528317	0.988363	1.14823	14.823	0.134868	13.4868	1.32337	32.3365	1.33619	18.8497	17.5135
153	887	1040	570	787	1357	0.172492	0.724269	0.268421	1.12706	0.147115	0.852885	0.420044	0.579956	0.766396	0.350238	-64.9762	-0.731579	-73.1579	0.238159	-76.1841	8.18168	3.02617	11.2078
543	611	1154	374	870	1244	0.888707	0.429885	1.45187	0.702299	0.470537	0.529463	0.300643	0.699357	0.927653	1.5651	56.5103	0.451872	45.1872	2.06731	106.731	11.3231	61.5442	50.2211
86	623	709	805	57	862	0.138042	14.1228	0.106832	10.9298	0.121298	0.878702	0.933875	0.0661253	0.822506	0.129886	-87.0114	-0.893168	-89.3168	0.00977438	-99.0226	2.30541	9.70579	12.0112
480	974	1454	188	24	212	0.492813	7.83333	2.55319	40.5833	0.330124	0.669876	0.886792	0.113208	6.85849	0.372267	-62.7733	1.55319	155.319	0.0629123	-93.7088	218.092	249.028	30.9355
822	63	885	485	913	1398	13.0476	0.531216	1.69485	0.0690033	0.928814	0.0711864	0.346924	0.653076	0.633047	2.67728	167.728	0.694845	69.4845	24.5618	2356.18	98.2436	2286.7	2188.45
391	298	689	198	881	1079	1.31208	0.224745	1.97475	0.338252	0.567489	0.432511	0.183503	0.816497	0.638554	3.09253	209.253	0.974747	97.4747	5.8381	483.81	111.778	386.335	274.557
310	239	549	570	40	610	1.29707	14.25	0.54386	5.975	0.564663	0.435337	0.934426	0.0655738	0.9	0.604288	-39.5712	-0.45614	-45.614	0.0910225	-90.8977	6.04288	45.2837	51.3266
976	781	1757	92	700	792	1.24968	0.131429	10.6087	1.11571	0.555492	0.444508	0.116162	0.883838	2.21843	4.78206	378.206	9.6087	960.87	9.50843	850.843	582.663	110.026	472.637
239	742	981	850	655	1505	0.322102	1.29771	0.281176	1.13282	0.243629	0.756371	0.564784	0.435216	0.651827	0.431367	-56.8633	-0.718824	-71.8824	0.248208	-75.1792	15.019	3.29681	18.3158
427	134	561	949	945	1894	3.18657	1.00423	0.449947	0.141799	0.761141	0.238859	0.501056	0.498944	0.296199	1.51907	51.9073	-0.550053	-55.0053	3.17314	217.314	106.913	272.319	165.406
577	337	914	594	677	1271	1.71217	0.8774	0.97138	0.497784	0.631291	0.368709	0.467349	0.532651	0.719119	1.35079	35.0793	-0.0286195	-2.86195	1.95141	95.1408	37.9412	98.0028	60.0615
305	119	424	424	188	612	2.56303	2.25532	0.71934	0.632979	0.71934	0.28066	0.69281	0.30719	0.69281	1.03829	3.82921	-0.28066	-28.066	1.13644	13.6436	31.8952	41.7096	9.81436
806	507	1313	974	454	1428	1.58974	2.14537	0.827515	1.11674	0.613861	0.386139	0.682073	0.317927	0.919468	0.899994	-10.0006	-0.172485	-17.2485	0.74101	-25.899	7.24785	8.65056	15.8984
584	637	1221	469	345	814	0.916797	1.35942	1.2452	1.84638	0.478296	0.521704	0.576167	0.423833	1.5	0.830135	-16.9865	0.245203	24.5203	0.674403	-32.5597	41.5068	57.0799	15.5732
792	422	1214	394	726	1120	1.87678	0.5427	2.01015	0.581267	0.652389	0.347611	0.351786	0.648214	1.08393	1.85451	85.4506	1.01015	101.015	3.45822	245.822	15.5646	144.807	160.372
189	260	449	677	488	1165	0.726923	1.3873	0.279173	0.532787	0.420935	0.579065	0.581116	0.418884	0.385408	0.724357	-27.5643	-0.720827	-72.0827	0.523986	-47.6014	44.5184	24.4813	20.0371
530	303	833	468	177	645	1.74917	2.64407	1.13248	1.71186	0.636255	0.363745	0.725581	0.274419	1.29147	0.876889	-12.3111	0.132479	13.2479	0.661547	-33.8453	25.5589	47.0932	21.5342
12	567	579	475	61	536	0.021164	7.78689	0.0252632	9.29508	0.0207254	0.979275	0.886194	0.113806	1.08022	0.023387	-97.6613	-0.974737	-97.4737	0.00271791	-99.7282	0.187619	2.25453	2.06691
621	487	1108	842	951	1793	1.27515	0.885384	0.73753	0.512093	0.560469	0.439531	0.469604	0.530396	0.617959	1.19349	19.3493	-0.26247	-26.247	1.44023	44.0227	45.5964	70.2698	24.6734
44	185	229	33	695	728	0.237838	0.047482	1.33333	0.266187	0.19214	0.80786	0.0453297	0.95467	0.31456	4.23872	323.872	0.333333	33.3333	5.00901	400.901	290.539	367.568	77.029
579	69	648	303	179	482	8.3913	1.69274	1.91089	0.385475	0.893519	0.106481	0.628631	0.371369	1.3444	1.42137	42.1373	0.910891	91.0891	4.95724	395.724	48.9518	304.635	353.587
146	99	245	10	404	414	1.47475	0.0247525	14.6	0.24505	0.595918	0.404082	0.0241546	0.975845	0.591787	24.671	2367.1	13.6	1360	59.5798	5857.98	1007.1	4497.98	3490.88
182	314	496	598	827	1425	0.579618	0.723096	0.304348	0.379686	0.366935	0.633065	0.419649	0.580351	0.34807	0.874386	-12.5614	-0.695652	-69.5652	0.801579	-19.8421	57.0039	49.7231	7.28079
415	226	641	812	644	1456	1.83628	1.26087	0.511084	0.350932	0.647426	0.352574	0.557692	0.442308	0.440247	1.1609	16.0902	-0.488916	-48.8916	1.45636	45.6363	64.9818	94.5279	29.5461
580	329	909	717	623	1340	1.76292	1.15088	0.808926	0.52809	0.638064	0.361936	0.535075	0.464925	0.678358	1.19248	19.2476	-0.191074	-19.1074	1.5318	53.1796	38.355	72.287	33.932
475	91	566	217	144	361	5.21978	1.50694	2.18894	0.631944	0.839223	0.160777	0.601108	0.398892	1.56787	1.39613	39.6126	1.18894	118.894	3.46382	246.382	79.2814	127.488	206.769
7	646	653	628	782	1410	0.0108359	0.803069	0.0111465	0.826087	0.0107198	0.98928	0.44539	0.55461	0.463121	0.0240682	-97.5932	-0.988854	-98.8854	0.0134931	-98.6507	1.29217	0.234663	1.05751
635	618	1253	409	297	706	1.02751	1.3771	1.55257	2.08081	0.506784	0.493216	0.57932	0.42068	1.77479	0.87479	-12.521	0.552567	55.2567	0.746137	-25.3863	67.7777	80.6431	12.8654
388	230	618	561	445	1006	1.68696	1.26067	0.691622	0.516854	0.627832	0.372168	0.557654	0.442346	0.614314	1.12584	12.5844	-0.308378	-30.8378	1.33814	33.8138	43.4222	64.6516	21.2294
181	714	895	751	973	1724	0.253501	0.77184	0.241012	0.733813	0.202235	0.797765	0.435615	0.564385	0.519142	0.464251	-53.5749	-0.758988	-75.8988	0.328438	-67.1562	22.3239	8.74259	13.5813
254	918	1172	346	755	1101	0.276688	0.458278	0.734104	1.21589	0.216724	0.783276	0.31426	0.68574	1.06449	0.689632	-31.0368	-0.265896	-26.5896	0.603757	-39.6243	4.44722	13.0347	8.58753
189	500	689	251	26	277	0.378	9.65385	0.752988	19.2308	0.274311	0.725689	0.906137	0.0938628	2.48736	0.302725	-69.7275	-0.247012	-24.7012	0.0391554	-96.0845	45.0263	71.3833	26.357
510	408	918	375	567	942	1.25	0.661376	1.36	0.719577	0.555556	0.444444	0.398089	0.601911	0.974522	1.39556	39.5556	0.36	36	1.89	89	3.55556	53	49.4444
49	550	599	165	99	264	0.0890909	1.66667	0.29697	5.55556	0.081803	0.918197	0.625	0.375	2.26894	0.130885	-86.9115	-0.70303	-70.303	0.0534545	-94.6545	16.6085	24.3515	7.74303
880	438	1318	989	449	1438	2.00913	2.20267	0.889788	0.975501	0.667678	0.332322	0.687761	0.312239	0.916551	0.9708	-2.91998	-0.110212	-11.0212	0.912134	-8.78661	8.10125	2.23463	5.86663
550	455	1005	220	245	465	1.20879	0.897959	2.5	1.85714	0.547264	0.452736	0.473118	0.526882	2.16129	1.15672	15.6716	1.5	150	1.34615	34.6154	134.328	115.385	18.9437
768	638	1406	777	53	830	1.20376	14.6604	0.988417	12.0377	0.54623	0.45377	0.936145	0.0638554	1.69398	0.583489	-41.6511	-0.011583	-1.1583	0.0821099	-91.789	40.4928	90.6307	50.138
186	885	1071	485	620	1105	0.210169	0.782258	0.383505	1.42742	0.173669	0.826331	0.438914	0.561086	0.969231	0.39568	-60.432	-0.616495	-61.6495	0.26867	-73.133	1.21748	11.4835	12.701
171	572	743	646	971	1617	0.298951	0.665294	0.264706	0.589083	0.230148	0.769852	0.399505	0.600495	0.459493	0.576083	-42.3917	-0.735294	-73.5294	0.449352	-55.0648	31.1377	18.4646	12.6731
565	312	877	348	700	1048	1.8109	0.497143	1.62356	0.445714	0.644242	0.355758	0.332061	0.667939	0.836832	1.94013	94.013	0.623563	62.3563	3.64261	264.261	31.6567	201.905	170.248
17	94	111	945	876	1821	0.180851	1.07877	0.0179894	0.107306	0.153153	0.846847	0.518946	0.481054	0.0609555	0.295124	-70.4876	-0.982011	-98.2011	0.167646	-83.2354	27.7134	14.9657	12.7478
202	937	1139	50	373	423	0.215582	0.134048	4.04	2.51206	0.177349	0.822651	0.118203	0.881797	2.69267	1.50037	50.0369	3.04	304	1.60824	60.8239	253.963	243.176	10.787
234	242	476	560	25	585	0.966942	22.4	0.417857	9.68	0.491597	0.508403	0.957265	0.042735	0.813675	0.513543	-48.6457	-0.582143	-58.2143	0.0431671	-95.6833	9.56858	37.469	47.0376
623	845	1468	869	117	986	0.737278	7.42735	0.716916	7.22222	0.424387	0.575613	0.881339	0.118661	1.48884	0.481525	-51.8475	-0.283084	-28.3084	0.0992653	-90.0735	23.5391	61.7651	38.226
902	514	1416	335	639	974	1.75486	0.524257	2.69254	0.804382	0.637006	0.362994	0.343943	0.656057	1.4538	1.85207	85.207	1.69254	169.254	3.34734	234.734	84.0467	65.48	149.527
229	550	779	368	604	972	0.416364	0.609272	0.622283	0.910596	0.293967	0.706033	0.378601	0.621399	0.80144	0.776455	-22.3545	-0.377717	-37.7717	0.683379	-31.6621	15.4173	6.10968	9.30759
711	970	1681	393	560	953	0.73299	0.701786	1.80916	1.73214	0.422963	0.577037	0.412382	0.587618	1.7639	1.02566	2.56572	0.80916	80.916	1.04446	4.44637	78.3503	76.4697	1.88065
393	810	1203	660	245	905	0.485185	2.69388	0.595455	3.30612	0.326683	0.673317	0.729282	0.270718	1.32928	0.447952	-55.2048	-0.404545	-40.4545	0.180107	-81.9893	14.7502	41.5348	26.7845
14	38	52	415	680	1095	0.368421	0.610294	0.0337349	0.0558824	0.269231	0.730769	0.378995	0.621005	0.0474886	0.71038	-28.962	-0.966265	-96.6265	0.603678	-39.6322	67.6645	56.9943	10.6702
352	850	1202	282	403	685	0.414118	0.699752	1.24823	2.10918	0.292845	0.707155	0.411679	0.588321	1.75474	0.711344	-28.8656	0.248227	24.8227	0.591806	-40.8194	53.6883	65.6421	11.9538
777	58	835	935	19	954	13.3966	49.2105	0.831016	3.05263	0.930539	0.0694611	0.980084	0.0199161	0.875262	0.949448	-5.05517	-0.168984	-16.8984	0.272229	-72.7771	11.8432	55.8787	67.7219
540	174	714	420	216	636	3.10345	1.94444	1.28571	0.805556	0.756303	0.243697	0.660377	0.339623	1.12264	1.14526	14.5258	0.285714	28.5714	1.59606	59.6059	14.0456	31.0345	45.0801
105	726	831	252	547	799	0.144628	0.460695	0.416667	1.32724	0.126354	0.873646	0.315394	0.684606	1.04005	0.400622	-59.9378	-0.583333	-58.3333	0.313935	-68.6065	1.60449	10.2732	8.66869
133	395	528	989	946	1935	0.336709	1.04545	0.134479	0.417548	0.251894	0.748106	0.511111	0.488889	0.272868	0.492836	-50.7164	-0.865521	-86.5521	0.322069	-67.7931	35.8357	18.759	17.0767
393	870	1263	791	610	1401	0.451724	1.29672	0.496839	1.42623	0.311164	0.688836	0.564597	0.435403	0.901499	0.551126	-44.8874	-0.503161	-50.3161	0.348359	-65.1641	5.42865	14.8481	20.2767
582	468	1050	598	622	1220	1.24359	0.961415	0.973244	0.752412	0.554286	0.445714	0.490164	0.509836	0.860656	1.13082	13.0817	-0.0267559	-2.67559	1.2935	29.35	15.7573	32.0256	16.2683
146	939	1085	11	392	403	0.155485	0.0280612	13.2727	2.39541	0.134562	0.865438	0.0272953	0.972705	2.69231	4.92987	392.987	12.2727	1227.27	5.5409	454.09	834.286	773.182	61.1034
967	831	1798	816	433	1249	1.16366	1.88453	1.18505	1.91917	0.53782	0.46218	0.653323	0.346677	1.43955	0.823207	-17.6793	0.185049	18.5049	0.61748	-38.252	36.1842	56.7569	20.5727
13	649	662	772	888	1660	0.0200308	0.869369	0.0168394	0.730856	0.0196375	0.980363	0.46506	0.53494	0.398795	0.0422256	-95.7774	-0.983161	-98.3161	0.0230406	-97.6959	2.53863	0.620125	1.9185
787	709	1496	12	33	45	1.11001	0.363636	65.5833	21.4848	0.52607	0.47393	0.266667	0.733333	33.2444	1.97276	97.2761	64.5833	6458.33	3.05254	205.254	6361.06	6253.08	107.978
443	7	450	469	549	1018	63.2857	0.854281	0.944563	0.0127505	0.984444	0.0155556	0.460707	0.539293	0.442043	2.13681	113.681	-0.0554371	-5.54371	74.0807	7308.07	119.225	7313.62	7194.39
159	455	614	784	140	924	0.349451	5.6	0.202806	3.25	0.258958	0.741042	0.848485	0.151515	0.664502	0.3052	-69.48	-0.797194	-79.7194	0.0624019	-93.7598	10.2394	14.0404	24.2798
35	513	548	990	629	1619	0.0682261	1.57393	0.0353535	0.81558	0.0638686	0.936131	0.611489	0.388511	0.338481	0.104448	-89.5552	-0.964646	-96.4646	0.0433477	-95.6652	6.90942	0.799417	6.11001
733	121	854	844	380	1224	6.05785	2.22105	0.868483	0.318421	0.858314	0.141686	0.689542	0.310458	0.697712	1.24476	24.4758	-0.131517	-13.1517	2.72747	172.747	37.6275	185.899	148.271
615	285	900	510	758	1268	2.15789	0.672823	1.20588	0.375989	0.683333	0.316667	0.402208	0.597792	0.709779	1.69895	69.8954	0.205882	20.5882	3.20722	220.722	49.3072	200.134	150.827
899	373	1272	535	680	1215	2.41019	0.786765	1.68037	0.548529	0.706761	0.293239	0.440329	0.559671	1.04691	1.60507	60.5074	0.680374	68.0374	3.06342	206.342	7.52998	138.304	145.834
876	821	1697	721	334	1055	1.06699	2.15868	1.21498	2.45808	0.516205	0.483795	0.683412	0.316588	1.60853	0.755335	-24.4665	0.214979	21.4979	0.494279	-50.5721	45.9644	72.07	26.1056
737	110	847	655	812	1467	6.7	0.80665	1.12519	0.135468	0.87013	0.12987	0.446489	0.553511	0.577369	1.94883	94.8825	0.125191	12.5191	8.30595	730.595	82.3634	718.076	635.713
992	905	1897	484	806	1290	1.09613	0.600496	2.04959	1.12283	0.522931	0.477069	0.375194	0.624806	1.47054	1.39376	39.3762	1.04959	104.959	1.82538	82.5378	65.5825	22.4209	43.1616
199	963	1162	895	518	1413	0.206646	1.7278	0.222346	1.85907	0.171256	0.828744	0.633404	0.366596	0.822364	0.270375	-72.9625	-0.777654	-77.7654	0.119601	-88.0399	4.80283	10.2746	15.0774
916	616	1532	802	949	1751	1.48701	0.8451	1.14214	0.649104	0.597911	0.402089	0.458024	0.541976	0.874929	1.30541	30.5415	0.142145	14.2145	1.75957	75.957	16.327	61.7426	45.4156
238	736	974	953	587	1540	0.32337	1.62351	0.249738	1.25383	0.244353	0.755647	0.618831	0.381169	0.632468	0.394862	-60.5138	-0.750262	-75.0262	0.199179	-80.0821	14.5125	5.05583	19.5683
351	704	1055	366	212	578	0.49858	1.72642	0.959016	3.32075	0.332701	0.667299	0.633218	0.366782	1.82526	0.525414	-47.4586	-0.0409836	-4.09836	0.288795	-71.1205	43.3603	67.0222	23.6619
410	821	1231	464	222	686	0.499391	2.09009	0.883621	3.6982	0.333063	0.666937	0.676385	0.323615	1.79446	0.492416	-50.7584	-0.116379	-11.6379	0.238933	-76.1067	39.1205	64.4688	25.3483
532	479	1011	537	455	992	1.11065	1.18022	0.990689	1.05275	0.526212	0.473788	0.541331	0.458669	1.01915	0.972071	-2.79293	-0.00931099	-0.931099	0.941051	-5.89488	1.86183	4.96379	3.10196
982	595	1577	772	948	1720	1.65042	0.814346	1.27202	0.627637	0.622701	0.377299	0.448837	0.551163	0.91686	1.38737	38.7366	0.272021	27.2021	2.02668	102.668	11.5345	75.4661	63.9316
708	287	995	545	550	1095	2.4669	0.990909	1.29908	0.521818	0.711558	0.288442	0.497717	0.502283	0.908676	1.42964	42.9644	0.299083	29.9083	2.48953	148.953	13.0561	119.045	105.989
680	326	1006	216	396	612	2.08589	0.545455	3.14815	0.823232	0.675944	0.324056	0.352941	0.647059	1.64379	1.91518	91.5176	2.14815	214.815	3.82413	282.413	123.297	67.5983	190.896
827	262	1089	533	651	1184	3.15649	0.81874	1.55159	0.402458	0.759412	0.240588	0.450169	0.549831	0.919764	1.68695	68.695	0.551595	55.1595	3.8553	285.53	13.5355	230.37	216.835
235	201	436	104	187	291	1.16915	0.55615	2.25962	1.07487	0.538991	0.461009	0.357388	0.642612	1.49828	1.50814	50.8138	1.25962	125.962	2.10223	110.223	75.1478	15.7386	59.4091
86	494	580	334	807	1141	0.174089	0.413879	0.257485	0.612144	0.148276	0.851724	0.292726	0.707274	0.508326	0.506535	-49.3465	-0.742515	-74.2515	0.420628	-57.9372	24.905	16.3143	8.59068
864	821	1685	516	512	1028	1.05238	1.00781	1.67442	1.60352	0.51276	0.48724	0.501946	0.498054	1.63911	1.02154	2.15444	0.674419	67.4419	1.04422	4.42172	65.2874	63.0201	2.26728
343	723	1066	440	217	657	0.474412	2.02765	0.779545	3.3318	0.321764	0.678236	0.669711	0.330289	1.62253	0.480452	-51.9548	-0.220455	-22.0455	0.233971	-76.6029	29.9094	54.5574	24.648
619	128	747	591	207	798	4.83594	2.85507	1.04738	0.618357	0.828648	0.171352	0.740602	0.259398	0.93609	1.11889	11.8885	0.0473773	4.73773	1.69381	69.3806	7.15077	64.6428	57.4921
185	702	887	888	53	941	0.263533	16.7547	0.208333	13.2453	0.208568	0.791432	0.943677	0.0563231	0.942614	0.221017	-77.8983	-0.791667	-79.1667	0.0157289	-98.4271	1.26832	19.2604	20.5288
503	57	560	446	423	869	8.82456	1.05437	1.1278	0.134752	0.898214	0.101786	0.513234	0.486766	0.644419	1.75011	75.0108	0.127803	12.7803	8.36948	736.948	62.2305	724.168	661.938
228	297	525	845	837	1682	0.767677	1.00956	0.269822	0.354839	0.434286	0.565714	0.502378	0.497622	0.312128	0.86446	-13.554	-0.730178	-73.0178	0.760409	-23.9591	59.4637	49.0586	10.4051
409	830	1239	766	138	904	0.492771	5.55072	0.533943	6.01449	0.330105	0.669895	0.847345	0.152655	1.37058	0.389576	-61.0424	-0.466057	-46.6057	0.088776	-91.1224	14.4367	44.5167	30.08
396	933	1329	39	270	309	0.424437	0.144444	10.1538	3.45556	0.297968	0.702032	0.126214	0.873786	4.30097	2.36083	136.083	9.15385	915.385	2.93841	193.841	779.302	721.543	57.7586
628	79	707	836	963	1799	7.94937	0.86812	0.751196	0.0820353	0.88826	0.11174	0.464703	0.535297	0.392996	1.91146	91.146	-0.248804	-24.8804	9.15699	815.699	116.026	840.579	724.553
100	994	1094	500	433	933	0.100604	1.15473	0.2	2.29561	0.0914077	0.908592	0.535906	0.464094	1.17256	0.170567	-82.9433	-0.8	-80	0.0871227	-91.2877	2.94333	11.2877	8.3444
321	828	1149	274	6	280	0.387681	45.6667	1.17153	138	0.279373	0.720627	0.978571	0.0214286	4.10357	0.285491	-71.4509	0.171533	17.1533	0.00848937	-99.1511	88.6042	116.304	27.7002
111	990	1101	550	380	930	0.112121	1.44737	0.201818	2.60526	0.100817	0.899183	0.591398	0.408602	1.18387	0.170473	-82.9527	-0.798182	-79.8182	0.0774656	-92.2534	3.13451	12.4353	9.30076
39	898	937	676	668	1344	0.0434298	1.01198	0.0576923	1.34431	0.0416222	0.958378	0.502976	0.497024	0.697173	0.0827518	-91.7248	-0.942308	-94.2308	0.0429159	-95.7084	2.50595	1.47764	3.98359
131	681	812	825	887	1712	0.192364	0.930101	0.158788	0.767756	0.16133	0.83867	0.481893	0.518107	0.474299	0.334784	-66.5216	-0.841212	-84.1212	0.206821	-79.3179	17.5996	4.80328	12.7964
490	322	812	805	427	1232	1.52174	1.88525	0.608696	0.754098	0.603448	0.396552	0.653409	0.346591	0.659091	0.923538	-7.64618	-0.391304	-39.1304	0.807183	-19.2817	31.4843	19.8488	11.6355
11	726	737	182	718	900	0.0151515	0.253482	0.0604396	1.01114	0.0149254	0.985075	0.202222	0.797778	0.818889	0.0738068	-92.6193	-0.93956	-93.956	0.0597736	-94.0226	1.33672	0.0666001	1.40332
266	972	1238	780	933	1713	0.273663	0.836013	0.341026	1.0418	0.214863	0.785137	0.455342	0.544658	0.722709	0.471872	-52.8128	-0.658974	-65.8974	0.327343	-67.2657	13.0846	1.36831	14.4529
81	470	551	582	235	817	0.17234	2.4766	0.139175	2	0.147005	0.852995	0.712362	0.287638	0.674419	0.206363	-79.3637	-0.860825	-86.0825	0.0695876	-93.0412	6.71881	6.95876	13.6776
696	989	1685	647	218	865	0.703741	2.96789	1.07573	4.5367	0.413056	0.586944	0.747977	0.252023	1.94798	0.552231	-44.7769	0.0757342	7.57342	0.237118	-76.2882	52.3503	83.8616	31.5113
203	252	455	12	829	841	0.805556	0.0144753	16.9167	0.303981	0.446154	0.553846	0.0142687	0.985731	0.541023	31.2679	3026.79	15.9167	1591.67	55.6505	5465.05	1435.13	3873.38	2438.25
211	629	840	920	372	1292	0.335453	2.47312	0.229348	1.69086	0.25119	0.74881	0.712074	0.287926	0.650155	0.352759	-64.7241	-0.770652	-77.0652	0.13564	-86.436	12.3411	9.37081	21.7119
520	753	1273	479	971	1450	0.690571	0.493306	1.08559	0.775489	0.408484	0.591516	0.330345	0.669655	0.877931	1.23654	23.6538	0.085595	8.5595	1.39988	39.9884	15.0943	31.4289	16.3346
625	936	1561	923	755	1678	0.667735	1.22252	0.67714	1.23974	0.400384	0.599616	0.55006	0.44994	0.930274	0.727893	-27.2107	-0.32286	-32.286	0.546197	-45.3803	5.07529	13.0943	18.1696
713	859	1572	117	660	777	0.830035	0.177273	6.09402	1.30152	0.453562	0.546438	0.150579	0.849421	2.02317	3.01212	201.212	5.09402	509.402	4.68225	368.225	308.19	141.177	167.013
175	574	749	246	683	929	0.304878	0.360176	0.711382	0.84041	0.233645	0.766355	0.264801	0.735199	0.806243	0.882342	-11.7658	-0.288618	-28.8618	0.84647	-15.353	17.096	13.5088	3.58714
401	693	1094	132	53	185	0.578644	2.49057	3.03788	13.0755	0.366545	0.633455	0.713514	0.286486	5.91351	0.513718	-48.6282	2.03788	203.788	0.232334	-76.7666	252.416	280.554	28.1384
